# Supplementary material
Source: ML conference proceedings conference paper supplement (https://proceedings.neurips.cc/paper_files/paper/2023/hash/52d63f9e4b81f866bf69fb3c834aad47-Abstract.html)
Supplement: Supplementary file 1 [file 52d63f9e4b81f866bf69fb3c834aad47-Supplemental-Conference.pdf]

---

# Multi-Swap $k$ -Means++

---

Anonymous Author(s)

Affiliation

Address

email

## Abstract

1 The  $k$ -means++ algorithm of Arthur and Vassilvitskii (SODA 2007) is often the  
2 practitioners’ choice algorithm for optimizing the popular  $k$ -means clustering ob-  
3 jective and is known to give an  $O(\log k)$ -approximation in expectation. To obtain  
4 higher quality solutions, Lattanzi and Sohler (ICML 2019) proposed augmenting  
5  $k$ -means++ with  $O(k \log \log k)$  local search steps obtained through the  $k$ -means++  
6 sampling distribution to yield a  $c$ -approximation to the  $k$ -means clustering problem,  
7 where  $c$  is a large absolute constant. Here we generalize and extend their local  
8 search algorithm by considering larger and more sophisticated local search neigh-  
9 borhoods hence allowing to swap multiple centers at the same time. Our algorithm  
10 achieves a  $9 + \varepsilon$  approximation ratio, which is the best possible for local search.  
11 Importantly we show that our approach yields substantial practical improvements,  
12 we show significant quality improvements over the approach of Lattanzi and Sohler  
13 (ICML 2019) on several datasets.

## 14 1 Introduction

15 Clustering is a central problem in unsupervised learning. In clustering one is interested in grouping  
16 together “similar” object and separate “dissimilar” one. Thanks to its popularity many notions of  
17 clustering have been proposed overtime. In this paper, we focus on metric clustering and on one of  
18 the most studied problem in the area: the Euclidean  $k$ -means problem.

19 In the Euclidean  $k$ -means problem one is given in input a set of points  $P$  in  $\mathbb{R}^d$ . The goal of  
20 the problem is to find a set of  $k$  centers so that the sum of the square distances to the centers  
21 is minimized. More formally, we are interested in finding a set  $C$  of  $k$  points in  $\mathbb{R}^d$  such that  
22  $\sum_{p \in P} \min_{c \in C} \|p - c\|^2$ , where with  $\|p - c\|$  we denote the Euclidean distance between  $p$  and  $c$ .

23 The  $k$ -means problem has a long history, in statistics and operations research. For Euclidean  $k$ -  
24 means with running time polynomial in both  $n, k$  and  $d$ , a 5.912-approximation was recently shown  
25 in Cohen-Addad et al. [2022a], improving upon Kanungo et al. [2004], Ahmadian et al. [2019],  
26 Grandoni et al. [2022] by leveraging the properties of the Euclidean metric. In terms of lower bounds,  
27 the first to show that the high-dimensional  $k$ -means problems were APX-hard were Guruswami and  
28 Indyk [2003], and later Awasthi et al. [2015] showed that the APX-hardness holds even if the centers  
29 can be placed arbitrarily in  $\mathbb{R}^d$ . The inapproximability bound was later slightly improved by Lee et al.  
30 [2017] until the recent best known bounds of Cohen-Addad and Karthik C. S. [2019], Cohen-Addad  
31 et al. [2022d] that showed that it is NP-hard to achieve a better than 1.06-approximation and hard to  
32 approximate it better than 1.36 assuming a stronger conjecture. From a more practical point of view,  
33 Arthur and Vassilvitskii [2009] showed that the widely-used popular heuristic of Lloyd Lloyd [1957]  
34 can lead to solutions with arbitrarily bad approximation guarantees, but can be improved by a simple  
35 seeding strategy, called  $k$ -means++, so as to guarantee that the output is within an  $O(\log k)$  factor of  
36 the optimum Arthur and Vassilvitskii [2007].

Thanks to its simplicity  $k$ -means++ is widely adopted in practice. In an effort to improve its performances Lattanzi and Sohler [2019], Choo et al. [2020] combine  $k$ -means++ and local search to efficiently obtain a constant approximation algorithm with good practical performance. These two studies show that one can use the  $k$ -means++ distribution in combination with a local search algorithm to get the best of both worlds: a practical algorithm with constant approximation guarantees.

However, the constant obtained in Lattanzi and Sohler [2019], Choo et al. [2020] is very large (several thousands in theory) and the question as whether one could obtain a practical algorithm that would efficiently match the  $9 + \varepsilon$ -approximation obtained by the  $n^{O(d/\varepsilon)}$  algorithm of Kanungo et al. [2004] has remained open. Bridging the gap between the theoretical approach of Kanungo et al. [2004] and  $k$ -means++ has thus been a long standing goal.

**Our Contributions.** We make significant progress on the above line of work.

- We adapt techniques from the analysis of Kanungo et al. [2004] to obtain a tighter analysis of the algorithm in Lattanzi and Sohler [2019]. In particular in Corollary 4, we show that their algorithm achieves an approximation of ratio of  $\approx 26.64$ .
- We extend this approach to multi-swaps, where we allow swapping more than one center at each iteration of local search, improving significantly the approximation to  $\approx 10.48$  in time  $O(nd \cdot \text{poly}(k))$ .
- Leveraging ideas from Cohen-Addad et al. [2021], we design a better local search swap that improves the approximation further to  $9 + \varepsilon$  (see Theorem 12). This new algorithm matches the  $9 + \varepsilon$ -approximation achieved by the local search algorithm in Kanungo et al. [2004], but it is significantly more efficient. Notice that 9 is the best approximation achievable through local search algorithms, as proved in Kanungo et al. [2004].
- We provide experiments where we compare against  $k$ -means++ and Lattanzi and Sohler [2019]. We study a variant of our algorithm that performs very competitively with our theoretically sound algorithm. The variant is very efficient and still outperforms previous work in terms of solution quality, even after the standard postprocessing using Lloyd.

**Additional Related Work.** We start by reviewing the approach of Kanungo et al. [2004] and a possible adaptation to our setting. The bound of  $9 + \varepsilon$  on the approximation guarantee shown by Kanungo et al. [2004] is for the following algorithm: Given a set  $S$  of  $k$  centers, if there is a set  $S^+$  of at most  $2/\varepsilon$  points in  $\mathbb{R}^d$  together with a set  $S^-$  of  $|S^+|$  points in  $S$  such that  $S \setminus S^- \cup S^+$  achieves a better  $k$ -means cost than  $S$ , then set  $S := S \setminus S^- \cup S^+$  and repeat until convergence. The main drawback of the algorithm is that it asks whether there exists a set  $S^+$  of points in  $\mathbb{R}^d$  that could be swapped with elements of  $S$  to improve the cost. Identifying such a set, even of constant size, is already non-trivial. The best way of doing so is through the following path: First compute a coresset using the state-of-the-art coresset construction of Cohen-Addad et al. [2022b] and apply the dimensionality reduction of Becchetti et al. [2019], Makarychev et al. [2019], hence obtaining a set of  $\tilde{O}(k/\varepsilon^4)$  points in dimension  $O(\log k/\varepsilon^2)$ . Then, compute grids using the discretization framework of Matousek [2000] to identify a set of  $\varepsilon^{-O(d)} \sim k^{O(\varepsilon^{-2} \log(1/\varepsilon))}$  grid points that contains nearly-optimum centers. Now, run the local search algorithm where the sets  $S^+$  are chosen from the grid points by brute-force enumeration over all possible subsets of grid points of size at most, say  $s$ . The running time of the whole algorithm with swaps of magnitude  $s$ , i.e.:  $|S^+| \leq s$ , hence becomes  $k^{O(s \cdot \varepsilon^{-2} \log(1/\varepsilon))}$  for an approximation of  $(1 + \varepsilon)(9 + 2/s)$ , meaning a dependency in  $k$  of  $k^{O(\varepsilon^{-3} \log(1/\varepsilon))}$  to achieve a  $9 + \varepsilon$ -approximation. Our results improves upon this approach in two ways: (1) it improves over the above theoretical bound and (2) does so through an efficient and implementable, i.e.: practical, algorithm.

Recently, Grunau et al. [2023] looked at how much applying a greedy rule on top of the  $k$ -means++ heuristic improves its performance. The heuristic is that at each step, the algorithm samples  $\ell$  centers and only keeps the one that gives the best improvement in cost. Interestingly the authors prove that from a theoretical standpoint this heuristic does not improve the quality of the output. Local search algorithms for  $k$ -median and  $k$ -means have also been studied by Gupta and Tangwongsan [2008] who drastically simplified the analysis of Arya et al. [2004]. Cohen-Addad and Schwiegelshohn [2017] demonstrated the power of local search for stable instances. Friggstad et al. [2019], Cohen-Addad et al. [2019] showed that local search yields a PTAS for Euclidean inputs of bounded dimension (and doubling metrics) and minor-free metrics. Cohen-Addad [2018] showed how to speed up the local search algorithm using  $kd$ -trees (i.e.: for low dimensional inputs).

For fixed  $k$ , there are several known approximation schemes, typically using small coresets Becchetti et al. [2019], Feldman and Langberg [2011], Kumar et al. [2010]. The state-of-the-art approaches are due to Bhattacharya et al. [2020], Jaiswal et al. [2014]. The best known coreset construction remains Cohen-Addad et al. [2022c,b].

If the constraint on the number of output centers is relaxed, then we talk about bicriteria approximations and  $k$ -means has been largely studied Bandyapadhyay and Varadarajan [2016], Charikar and Guha [2005], Cohen-Addad and Mathieu [2015], Korupolu et al. [2000], Makarychev et al. [2016].

## 2 Preliminaries

**Notation.** We denote with  $P \subseteq \mathbb{R}^d$  the set of input points and let  $n = |P|$ . Given a point set  $Q \subseteq P$  we use  $\mu(Q)$  to denote the mean of points in  $Q$ . Given a point  $p \in P$  and a set of centers  $A$  we denote with  $A[p]$  the closest center in  $A$  to  $p$  (ties are broken arbitrarily). We denote with  $\mathcal{C}$  the set of centers currently found by our algorithm and with  $\mathcal{O}^*$  an optimal set of centers. Therefore, given  $p \in P$ , we denote with  $\mathcal{C}[p]$  and  $\mathcal{O}^*[p]$  its closest ALG-center and OPT-center respectively. We denote by  $\text{cost}(Q, A)$  the cost of points in  $Q \subseteq P$  w.r.t. the centers in  $A$ , namely

$$\text{cost}(Q, A) = \sum_{q \in Q} \min_{c \in A} \|q - c\|^2.$$

We use ALG and OPT as a shorthand for  $\text{cost}(P, \mathcal{C})$  and  $\text{cost}(P, \mathcal{O}^*)$  respectively. When we sample points proportionally to their current cost (namely, sample  $q$  with probability  $\text{cost}(q, \mathcal{C}) / \text{cost}(P, \mathcal{C})$ ) we call this the  $D^2$  distribution. When using  $O_\varepsilon(\cdot)$  and  $\Omega_\varepsilon(\cdot)$  we mean that  $\varepsilon$  is considered constant. We use  $\tilde{O}(f)$  to hide polylogarithmic factors in  $f$ . The following lemma is folklore.

**Lemma 1.** *Given a point set  $Q \subseteq P$  and a point  $p \in P$  we have*

$$\text{cost}(Q, p) = \text{cost}(Q, \mu(Q)) + |Q| \cdot \|p - \mu(Q)\|^2.$$

Let  $O_i^*$  be an optimal cluster, we define the *radius* of  $O_i^*$  as  $\rho_i$  such that  $\rho_i^2 \cdot |O_i^*| = \text{cost}(O_i^*, o_i)$ , where  $o_i = \mu(O_i^*)$ . We define the  $\delta$ -core of the optimal cluster  $O_i^*$  as the set of points  $p \in O_i^*$  that lie in a ball of radius  $(1 + \delta)\rho_i$  centered in  $o_i$ . In symbols,  $\text{core}(O_i^*) = P \cap B(o_i, (1 + \delta)\rho_i)$ . Throughout the paper,  $\delta$  is always a small constant fixed upfront, hence we omit it.

**Lemma 2.** *Let  $O_i^*$  be an optimal cluster and sample  $q \in O_i^*$  according to the  $D^2$ -distribution restricted to  $O_i^*$ . If  $\text{cost}(O_i^*, \mathcal{C}) > (2 + 3\delta) \cdot \text{cost}(O_i^*, o_i)$  then  $\Pr[q \in \text{core}(O_i^*)] = \Omega_\delta(1)$ .*

*Proof.* Define  $\alpha := \text{cost}(O_i^*, \mathcal{C}) / \text{cost}(O_i^*, o_i) > 2 + 3\delta$ . Thanks to Lemma 1, for each  $c \in \mathcal{C}$  we have  $\|c - o_i\|^2 \geq (\alpha - 1)\rho_i^2$ . Therefore, for each  $y \in \text{core}(O_i^*)$  and every  $c \in \mathcal{C}$  we have

$$\text{cost}(y, c) = \|y - c\|^2 \geq (\sqrt{\alpha - 1} - (1 + \delta))^2 \cdot \rho_i^2 = \Omega_\delta(\alpha \rho_i^2).$$

Moreover, by a Markov's inequality argument we have  $|O_i^* \setminus \text{core}(O_i^*)| \leq \frac{1}{1 + \delta} \cdot |O_i^*|$  and thus  $|\text{core}(O_i^*)| \geq \Omega_\delta(|O_i^*|)$ . Combining everything we get

$$\text{cost}(\text{core}(O_i^*), \mathcal{C}) \geq |\text{core}(O_i^*)| \cdot \min_{\substack{c \in \mathcal{C} \\ y \in \text{core}(O_i^*)}} \text{cost}(y, c) = \Omega_\delta(|O_i^*|) \cdot \Omega_\delta(\alpha \rho_i^2)$$

and  $|O_i^*| \cdot \alpha \rho_i^2 = \text{cost}(O_i^*, \mathcal{C})$ , hence  $\text{cost}(\text{core}(O_i^*), \mathcal{C}) = \Omega_\delta(\text{cost}(O_i^*, \mathcal{C}))$ .  $\square$

## 3 Multi-Swap $k$ -Means++

The single-swap local search (SSLS)  $k$ -means++ algorithm in Lattanzi and Sohler [2019] works as follows. First,  $k$  centers are sampled using  $k$ -means++ (namely, they are sampled one by one according to the  $D^2$  distribution, updated for every new center). Then,  $O(k \log \log k)$  steps of local search follow. In each local search step a point  $q \in P$  is  $D^2$ -sampled, then let  $c$  be the center among the current centers  $\mathcal{C}$  such that  $\text{cost}(P, (\mathcal{C} \setminus \{c\}) \cup \{q\})$  is minimum. If  $\text{cost}(P, (\mathcal{C} \setminus \{c\}) \cup \{q\}) < \text{cost}(P, \mathcal{C})$  then we swap  $c$  and  $q$ , or more formally we set  $\mathcal{C} \leftarrow (\mathcal{C} \setminus \{c\}) \cup \{q\}$ .

We extend the SSLS so that we allow to swap multiple centers simultaneously and call this algorithm multi-swap local search (MSLS)  $k$ -means++. Swapping multiple centers at the same time achieves a lower approximation ratio, in exchange for a higher time complexity. In this section, we present and analyse the  $p$ -swap local search (LS) algorithm for a generic number of  $p$  centers swapped at each step. For any constant  $\delta > 0$ , we obtain an approximation ratio  $\text{ALG}/\text{OPT} = \eta^2 + \delta$  where

$$\eta^2 - (2 + 2/p)\eta - (4 + 2/p) = 0. \quad (1)$$

**The Algorithm.** First, we initialize our set of centers using  $k$ -means++. Then, we run  $O(ndk^{p-1})$  local search steps, where a local search step works as follows. We  $D^2$ -sample a set  $In = \{q_1 \dots q_p\}$  of points from  $P$  (without updating costs). Then, we iterate over all possible sets  $Out = \{c_1 \dots c_p\}$  of  $p$  distinct elements in  $\mathcal{C} \cup In$  and select the set  $Out$  such that performing the swap  $(In, Out)$  maximally improves the cost<sup>1</sup>. If this choice of  $Out$  improves the cost, then we perform the swap  $(In, Out)$ , else we do not perform any swap for this step.

**Theorem 3.** For any  $\delta > 0$ , the  $p$ -swap local search algorithm above runs in  $\tilde{O}(ndk^{2p})$  time and, with constant probability, finds an  $(\eta^2 + \delta)$ -approximation of  $k$ -means, where  $\eta$  satisfies Equation (1).

Notice that the SSLS algorithm of Lattanzi and Sohler [2019] is exactly the  $p$ -swap LS algorithm above for  $p = 1$ .

**Corollary 4.** The single-swap local search in Lattanzi and Sohler [2019], Choo et al. [2020] achieves an approximation ratio  $< 26.64$ .

**Corollary 5.** For  $p = O(1)$  large enough, multi-swap local search achieves an approximation ratio  $< 10.48$  in time  $O(nd \cdot \text{poly}(k))$ .

### 3.1 Analysis of Multi-Swap $k$ -means++

In this section we prove Theorem 3. Our main stepping stone is the following lemma.

**Lemma 6.** Let  $ALG$  denote the cost at some point in the execution of  $MSLS$ . As long as  $ALG/OPT > \eta^2 + \delta$ , a local search step improves the cost by a factor  $1 - \Omega(1/k)$  with probability  $\Omega(1/k^{p-1})$ .

*Proof of Theorem 3.* First, we show that  $O(k^p \log \log k)$  local steps suffice to obtain the desired approximation ratio, with constant probability. Notice that a local search step can only improve the cost function, so it is sufficient to show that the approximation ratio is achieved at some point in time. We initialize our centers using  $k$ -means++, which gives a  $O(\log k)$ -approximation in expectation. Thus, using Markov's inequality the approximation guarantee  $O(\log k)$  holds with arbitrary high constant probability. We say that a local-search step is *successful* if it improves the cost by a factor of at least  $1 - \Omega(1/k)$ . Thanks to Lemma 6, we know that unless the algorithm has already achieved the desired approximation ratio then a local-search step is successful with probability  $\Omega(1/k^{p-1})$ . To go from  $O(\log k)$  to  $\eta^2 + \delta$  we need  $O(k \log \log k)$  successful local search steps. Standard concentration bounds on the value of a Negative Binomial random variable show that, with high probability, the number of trial to obtain  $O(k \log \log k)$  successful local-search steps is  $O(k^p \log \log k)$ . Therefore, after  $O(k^p \log \log k)$  local-search steps we obtain an approximation ratio of  $\eta^2 + \delta$ .

To prove the running time bound it is sufficient to show that a local search step can be performed in time  $\tilde{O}(ndk^{p-1})$ . This is possible if we maintain, for each point  $x \in P$ , a dynamic sorted dictionary<sup>2</sup> storing the pairs  $(\text{cost}(x, c_i), c_i)$  for each  $c_i \in \mathcal{C}$ . Then we can combine the exhaustive search over all possible size- $p$  subsets of  $\mathcal{C} \cup In$  and the computation of the new cost function using time  $O(ndk^{p-1} \log k)$ . To do so, we iterate over all possible size- $(p-1)$  subsets  $Z$  of  $\mathcal{C} \cup In$  and update all costs as if these centers were removed, then for each point  $x \in P$  we compute how much its cost increases if we remove its closest center  $c_x$  in  $(\mathcal{C} \cup In) \setminus Z$  and charge that amount to  $c_x$ . In the end, we consider  $Out = Z \cup \{c\}$  where  $c$  is the cheapest-to-remove center found in this way.  $\square$

The rest of this section is devoted to proving Lemma 6. For convenience, we prove that Lemma 6 holds whenever  $ALG/OPT > \eta^2 + O(\delta)$ , which is wlog by rescaling  $\delta$ . Recall that we now focus on a given step of the algorithm, and when we say current cost, current centers and current clusters we refer to the state of these objects at the end of the last local-search step before the current one. Let  $O_1^* \dots O_k^*$  be an optimal clustering of  $P$  and let  $\mathcal{O}^* = \{o_i = \mu(O_i^*) \mid \text{for } i = 1 \dots k\}$  be the set of optimal centers of these clusters. We denote with  $C_1 \dots C_k$  the current set of clusters at that stage of the local search and with  $\mathcal{C} = \{c_1 \dots c_k\}$  the set of their respective current centers.

We say that  $c_i$  *captures*  $o_j$  if  $c_i$  is the closest current center to  $o_j$ , namely  $c_i = \mathcal{C}[o_j]$ . We say that  $c_i$  is *busy* if it captures more than  $p$  optimal centers, and we say it is *lonely* if it captures no optimal center. Let  $\tilde{\mathcal{O}} = \{o_i \mid \text{cost}(O_i^*, \mathcal{C}) > \delta \cdot ALG/k\}$  and  $\tilde{\mathcal{C}} = \mathcal{C} \setminus \{\mathcal{C}[o_i] \mid o_i \in \mathcal{O}^* \setminus \tilde{\mathcal{O}}\}$ . For ease of notation, we simply assume that  $\tilde{\mathcal{O}} = \{o_1 \dots o_h\}$  and  $\tilde{\mathcal{C}} = \{c_1 \dots c_{h'}\}$ . Notice that  $h' > h$ .

<sup>1</sup>If  $In \cap Out \neq \emptyset$  then we are actually performing the swap  $(In \setminus Out, Out \setminus In)$  of size  $< p$ .

<sup>2</sup>Also known as dynamic predecessor search data structure.

**Weighted ideal multi-swaps.** Given  $In \subseteq P$  and  $Out \subseteq \tilde{\mathcal{C}}$  of the same size we say that the swap  $(In, Out)$  is an *ideal swap* if  $In \subseteq \tilde{\mathcal{O}}$ . We now build a set of *weighted ideal multi-swaps*  $\mathcal{S}$ . First, suppose wlog that  $\{c_1 \dots c_t\}$  is the set of current centers in  $\tilde{\mathcal{C}}$  that are neither lonely nor busy. Let  $\mathcal{L}$  be the set of lonely centers in  $\tilde{\mathcal{C}}$ . For each  $i = 1 \dots t$ , we do the following. Let  $In$  be the set of optimal centers in  $\tilde{\mathcal{O}}$  captured by  $c_i$ . Choose a set  $\mathcal{L}_i$  of  $|In| - 1$  centers from  $\mathcal{L}$ , set  $\mathcal{L} \leftarrow \mathcal{L} \setminus \mathcal{L}_i$  and define  $Out = \mathcal{L}_i \cup \{c_i\}$ . Assign weight 1 to  $(In, Out)$  and add it to  $\mathcal{S}$ . For each busy center  $c_i \in \{c_{t+1} \dots c_{h'}\}$  let  $A$  be the set of optimal centers in  $\tilde{\mathcal{O}}$  captured by  $c_i$ , pick a set  $\mathcal{L}_i$  of  $|A| - 1$  lonely current centers from  $\mathcal{L}$  (a counting argument shows that this is always possible). Set  $\mathcal{L} \leftarrow \mathcal{L} \setminus \mathcal{L}_i$ . For each  $o_j \in A$  and  $c_\ell \in \mathcal{L}_i$  assign weight  $1/(|A| - 1)$  to  $(o_j, c_\ell)$  and add it to  $\mathcal{S}$ .

**Observation 7.** *The process above generates a set of weighted ideal multi-swaps such that: (i) Every swap has size at most  $p$ ; (ii) The combined weights of swaps involving an optimal center  $o_i$  is 1; (iii) The combined weights of swaps involving a current center  $c_i$  is at most  $1 + 1/p$ .*

Consider an ideal swap  $(In, Out)$ . Let  $O_{In}^* = \bigcup_{o_i \in In} O_i^*$  and  $C_{Out} = \bigcup_{c_j \in Out} C_j$ . Define the reassignment cost  $\text{Reassign}(In, Out)$  as the increase in cost of reassigning points in  $C_{Out} \setminus O_{In}^*$  to centers in  $\mathcal{C} \setminus Out$ . Namely,

$$\text{Reassign}(In, Out) = \text{cost}(C_{Out} \setminus O_{In}^*, \mathcal{C} \setminus Out) - \text{cost}(C_{Out} \setminus O_{In}^*, \mathcal{C}).$$

We take the increase in cost of the following reassignment as an upper bound to the reassignment cost. For each  $p \in C_{Out} \setminus O_{In}^*$  we consider its closest optimal center  $\mathcal{O}^*[p]$  and reassign  $p$  to the current center that is closest to  $\mathcal{O}^*[p]$ , namely  $\mathcal{C}[\mathcal{O}^*[p]]$ . In formulas, we have

$$\begin{aligned} \text{Reassign}(In, Out) &\leq \sum_{p \in C_{Out} \setminus O_{In}^*} \text{cost}(p, \mathcal{C}[\mathcal{O}^*[p]]) - \text{cost}(p, \mathcal{C}[p]) \\ &\leq \sum_{p \in C_{Out}} \text{cost}(p, \mathcal{C}[\mathcal{O}^*[p]]) - \text{cost}(p, \mathcal{C}[p]). \end{aligned}$$

Indeed, by the way we defined our ideal swaps we have  $\mathcal{C}[\mathcal{O}^*[p]] \notin Out$  for each  $p \notin O_{In}^*$  and this reassignment is valid. Notice that the right hand side in the equation above does not depend on  $In$ .

**Lemma 8.**  $\sum_{p \in P} \text{cost}(p, \mathcal{C}[\mathcal{O}^*[p]]) \leq 2OPT + ALG + 2\sqrt{ALG}\sqrt{OPT}$ .

*Proof.* Deferred to the supplementary material.  $\square$

**Lemma 9.** *The combined weighted reassignment costs of all ideal multi-swaps in  $\mathcal{S}$  is at most  $(2 + 2/p) \cdot (OPT + \sqrt{ALG}\sqrt{OPT})$ .*

*Proof.* Denote by  $w(In, Out)$  the weight associated with the swap  $(In, Out)$ .

$$\begin{aligned} \sum_{(In, Out) \in \mathcal{S}} w(In, Out) \cdot \text{Reassign}(In, Out) &\leq \\ \sum_{(In, Out) \in \mathcal{S}} w(In, Out) \cdot \sum_{p \in C_{Out}} \text{cost}(p, \mathcal{C}[\mathcal{O}^*[p]]) - \text{cost}(p, \mathcal{C}[p]) &\leq \\ (1 + 1/p) \cdot \sum_{c_j \in \mathcal{C}} \sum_{p \in C_j} \text{cost}(p, \mathcal{C}[\mathcal{O}^*[p]]) - \text{cost}(p, \mathcal{C}[p]) &\leq \\ (1 + 1/p) \cdot \left( \sum_{p \in P} \text{cost}(p, \mathcal{C}[\mathcal{O}^*[p]]) - ALG \right). \end{aligned}$$

The second inequality uses (iii) from Observation 7. Applying Lemma 8 completes the proof.  $\square$

Recall the notions of radius and core of an optimal cluster introduced in Section 2. We say that a swap  $(In, Out)$  is *strongly improving* if  $\text{cost}(P, (\mathcal{C} \cup In) \setminus Out) \leq (1 - \delta/k) \cdot \text{cost}(P, \mathcal{C})$ . Let  $In = \{o_1 \dots o_s\} \subseteq \tilde{\mathcal{O}}$  and  $Out = \{c_1 \dots c_s\} \subseteq \tilde{\mathcal{C}}$  we say that an ideal swap  $(In, Out)$  is *good* if for every  $q_1 \in \text{core}(o_1) \dots q_s \in \text{core}(o_s)$  the swap  $(Q, Out)$  is strongly improving, where  $Q = \{q_1 \dots q_s\}$ . We call an ideal swap *bad* otherwise. We say that an optimal center  $o_i \in \tilde{\mathcal{O}}$  is good if that's the case for at least one of the ideal swaps it belongs to. Recalling how we constructed our

215 set of weighted ideal swaps  $\mathcal{S}$ , if  $o_i$  belongs to a  $s$ -swap  $(In, Out) \in \mathcal{S}$  for  $s > 1$  then it is good if  
 216 and only if  $(In, Out)$  is good; else  $o_i$  might belong to up to  $p - 1$  single swaps and then any of them  
 217 being good would suffice. Denote with  $G$  the union of cores of good optimal centers in  $\tilde{\mathcal{O}}$ .

218 **Lemma 10.** *If an ideal swap  $(In, Out)$  is bad, then we have*

$$\text{cost}(O_{In}^*, \mathcal{C}) \leq (2 + \delta) \text{cost}(O_{In}^*, \mathcal{O}^*) + \text{Reassign}(In, Out) + \delta \text{ALG}/k. \quad (2)$$

219 *Proof.* Let  $In = \{o_1 \dots o_s\}$ ,  $\mathcal{Q} = \{q_1 \dots q_s\}$  such that  $q_1 \in \text{core}(o_1) \dots q_s \in \text{core}(o_s)$ .  
 220 Then, by Lemma 1  $\text{cost}(O_{In}^*, \mathcal{Q}) \leq (2 + \delta) \text{cost}(O_{In}^*, \mathcal{O}^*)$ . Moreover,  $\text{Reassign}(In, Out) =$   
 221  $\text{cost}(P \setminus O_{In}^*, \mathcal{C} \setminus Out) - \text{cost}(P \setminus O_{In}^*, \mathcal{C})$  because points in  $P \setminus C_{Out}$  are not affected by the  
 222 swap. Therefore,  $\text{cost}(P, (\mathcal{C} \cup \mathcal{Q}) \setminus Out) \leq (2 + \delta) \text{cost}(O_{In}^*, \mathcal{O}^*) + \text{Reassign}(In, Out) +$   
 223  $\text{cost}(P \setminus O_{In}^*, \mathcal{C})$ . Suppose by contradiction that Equation (4) does not hold, then

$$\begin{aligned} & \text{cost}(P, \mathcal{C}) - \text{cost}(P, (\mathcal{C} \cup \mathcal{Q}) \setminus Out) = \\ & \text{cost}(P \setminus O_{In}^*, \mathcal{C}) + \text{cost}(O_{In}^*, \mathcal{C}) - \text{cost}(P, (\mathcal{C} \cup \mathcal{Q}) \setminus Out) \geq \delta \text{ALG}/k. \end{aligned}$$

224 Hence,  $(\mathcal{Q}, Out)$  is strongly improving and this holds for any choice of  $\mathcal{Q}$ , contradiction.  $\square$

225 **Lemma 11.** *If  $\text{ALG}/\text{OPT} > \eta^2 + \delta$  then  $\text{cost}(G, \mathcal{C}) = \Omega_\delta(\text{cost}(P, \mathcal{C}))$ . Thus, if we  $D^2$ -sample  $q$   
 226 we have  $P[q \in G] = \Omega_\delta(1)$ .*

227 *Proof.* First, we observe that the combined current cost of all optimal clusters in  $\mathcal{O}^* \setminus \tilde{\mathcal{O}}$  is at most  
 228  $k \cdot \delta \text{ALG}/k = \delta \text{ALG}$ . Now, we prove that the combined current cost of all  $O_i^*$  such that  $o_i$  is bad is  
 229  $\leq (1 - 2\delta) \text{ALG}$ . Suppose, by contradiction, that it is not the case, then we have:

$$\begin{aligned} (1 - 2\delta) \text{ALG} &< \sum_{\text{Bad } o_i \in \tilde{\mathcal{O}}} \text{cost}(O_i^*, \mathcal{C}) \leq \sum_{\text{Bad } (In, Out) \in \mathcal{S}} w(In, Out) \cdot \text{cost}(O_{In}^*, \mathcal{C}) \leq \\ & \sum_{\text{Bad } (In, Out)} w(In, Out) \cdot ((2 + \delta) \text{cost}(O_{In}^*, \mathcal{O}^*) + \text{Reassign}(In, Out) + \delta \text{ALG}/k) \leq \\ & (2 + \delta) \text{OPT} + (2 + 2/p) \text{OPT} + (2 + 2/p) \sqrt{\text{ALG}} \sqrt{\text{OPT}} + \delta \text{ALG}. \end{aligned}$$

230 The second and last inequalities make use of Observation 7. The third inequality uses Lemma 10.

231 Setting  $\eta^2 = \text{ALG}/\text{OPT}$  we obtain the inequality  $\eta^2 - (2 + 2/p \pm O(\delta))\eta - (4 + 2/p \pm O(\delta)) \leq 0$ .  
 232 Hence, we obtain a contradiction in the previous argument as long as  $\eta^2 - (2 + 2/p \pm O(\delta))\eta -$   
 233  $(4 + 2/p \pm O(\delta)) > 0$ . A contradiction there implies that at least an  $\delta$ -fraction of the current cost is  
 234 due to points in  $\bigcup_{\text{Good } o_i \in \tilde{\mathcal{O}}} O_i^*$ . We combine this with Lemma 2 and conclude that the total current  
 235 cost of  $G = \bigcup_{\text{Good } o_i \in \tilde{\mathcal{O}}} \text{core}(O_i^*)$  is  $\Omega_\delta(\text{cost}(P, \mathcal{C}))$ .  $\square$

236 Finally, we prove Lemma 6. Whenever  $q_1 \in G$  we have that  $q_1 \in \text{core}(o_1)$  for some good  $o_1$ .  
 237 Then, for some  $s \leq p$  we can complete  $o_1$  with  $o_2 \dots o_s$  such that  $In = \{o_1 \dots o_s\}$  belongs  
 238 to a good swap. Concretely, there exists  $Out \subseteq \mathcal{C}$  such that  $(In, Out)$  is a good swap. Since  
 239  $In \subset \tilde{\mathcal{O}}$  we have  $\text{cost}(O_i^*, \mathcal{C}) > \delta \text{OPT}/k$  for all  $o_i \in In$ , which combined with Lemma 2 gives  
 240 that for  $i = 2 \dots s$   $P[q_i \in \text{core}(o_i)] \geq \Omega_\delta(1/k)$ . Hence, we have  $P[q_i \in \text{core}(o_i) \text{ for } i =$   
 241  $1 \dots s] \geq \Omega_{\delta, p}(1/k^{p-1})$ . Whenever we sample  $q_1 \dots q_s$  from  $\text{core}(o_1) \dots \text{core}(o_s)$ , we have that  
 242  $(\mathcal{Q}, Out)$  is strongly improving. Notice, however, that  $(\mathcal{Q}, Out)$  is a  $s$ -swap and we may have  $s < p$ .  
 243 Nevertheless, whenever we sample  $q_1 \dots q_s$  followed by any sequence  $q_{s+1} \dots q_p$  it is enough to  
 244 choose  $Out' = Out \cup \{q_{s+1} \dots q_p\}$  to obtain that  $(\{q_1 \dots q_p\}, Out')$  is an improving  $p$ -swap.

## 245 4 A Faster $(9 + \varepsilon)$ -Approximation Local Search Algorithm

246 The MSLS algorithm from Section 3 achieves an approximation ratio of  $\eta^2 + \varepsilon$ , where  $\eta^2 - (2 +$   
 247  $2/p)\eta - (4 + 2/p) = 0$  and  $\varepsilon > 0$  is an arbitrary small constant. For large  $p$  we have  $\eta \approx 10.48$ . On  
 248 the other hand, employing  $p$  simultaneous swaps, Kanungo et al. [2004] achieve an approximation  
 249 factor of  $\xi^2 + \varepsilon$  where  $\xi^2 - (2 + 2/p)\xi - (3 + 2/p) = 0$ . If we set  $p \approx 1/\varepsilon$  this yields a  $(9 + O(\varepsilon))$ -  
 250 approximation. In the same paper, they prove that 9-approximation is indeed the best possible for  
 251  $p$ -swap local search, if  $p$  is constant (see Theorem 3.1 in Kanungo et al. [2004]). They showed that 9  
 252 is the right locality gap for local search, but they matched it with a very slow algorithm. To achieve a  
 253  $(9 + \varepsilon)$ -approximation, they discretize the space reducing to  $O(n\varepsilon^{-d})$  candidate centers and perform  
 254 an exhaustive search over all size- $(1/\varepsilon)$  subsets of candidates at every step. As we saw in the related

work section, it is possible to combine techniques from coresets and dimensionality reduction to reduce the number of points to  $n' = k \cdot \text{poly}(\varepsilon^{-1})$  and the number of dimensions to  $d' = \log k \cdot \varepsilon^{-2}$ . This reduces the complexity of Kanungo et al. [2004] to  $k^{O(\varepsilon^{-3} \log \varepsilon^{-1})}$ .

In this section, we leverage techniques from Cohen-Addad et al. [2021] to achieve a  $(9 + \varepsilon)$ -approximation faster<sup>3</sup>. In particular, we obtain the following.

**Theorem 12.** *Given a set of  $n$  points in  $\mathbb{R}^d$  with aspect ratio  $\Delta$ , there exists an algorithm that computes a  $9 + \varepsilon$ -approximation to  $k$ -means in time  $ndk^{O(\varepsilon^{-2})} \log^{O(\varepsilon^{-1})}(\Delta) \cdot 2^{-\text{poly}(\varepsilon^{-1})}$ .*

Notice that, besides being asymptotically slower, the pipeline obtained combining known techniques is highly impractical and thus it did not make for an experimental test-bed. Moreover, it is not obvious how to simplify such an ensemble of complex techniques to obtain a practical algorithm.

**Limitations of MSLS.** The barrier we need to overcome in order to match the bound in Kanungo et al. [2004] is that, while we only consider points in  $P$  as candidate centers, the discretization they employ considers also points in  $\mathbb{R}^d \setminus P$ . In the analysis of MSLS we show that we sample each point  $q_i$  from  $\text{core}(O_i^*)$  or equivalently that  $q_i \in B(o_i, (1 + \varepsilon)\rho_i)$ , where  $\rho_i$  is such that  $O_i^*$  would have the same cost w.r.t.  $o_i$  if all its points were moved on a sphere of radius  $\rho_i$  centered in  $o_i$ . This allows us to use a Markov's inequality kind of argument and conclude that there must be  $\Omega_\varepsilon(|O_i^*|)$  points in  $O_i^* \cap B(o_i, (1 + \varepsilon)\rho_i)$ . However, we have no guarantee that there is any point at all in  $O_i^* \cap B(o_i, (1 - \varepsilon)\rho_i)$ . Indeed, all points in  $O_i^*$  might lie on  $\partial B(o_i, \rho_i)$ . The fact that potentially all our candidate centers  $q$  are at distance at least  $\rho_i$  from  $o_i$  yields (by Lemma 1)  $\text{cost}(O_i^*, q) \geq 2\text{cost}(O_i^*, o_i)$ , which causes the zero-degree term in  $\xi^2 - (2 + 2/p)\xi - (3 + 2/p) = 0$  from Kanungo et al. [2004] to become a 4 in our analysis.

**Improving MSLS by taking averages.** First, we notice that, in order to achieve  $(9 + \varepsilon)$ -approximation we need to set  $p = \Theta(1/\varepsilon)$ . The main hurdle to achieve a  $(9 + \varepsilon)$ -approximation is that we need to replace the  $q_i$  in MSLS with a better approximation of  $o_i$ . We design a subroutine that computes, with constant probability, an  $\varepsilon$ -approximation  $\hat{o}_i$  of  $o_i$  (namely,  $\text{cost}(O_i^*, \hat{o}_i) \leq (1 + \varepsilon)\text{cost}(O_i^*, o_i)$ ). The key idea is that, if sample uniformly  $O(1/\varepsilon)$  points from  $O_i^*$  and define  $\hat{o}_i$  to be the average of our samples then  $\text{cost}(O_i^*, \hat{o}_i) \leq (1 + \varepsilon)\text{cost}(O_i^*, o_i)$ .

Though, we do not know  $O_i^*$ , so sampling uniformly from it is non-trivial. To achieve that, for each  $q_i$  we identify a set  $N$  of *nice* candidate points in  $P$  such that a  $\text{poly}(\varepsilon)/k$  fraction of them are from  $O_i^*$ . We sample  $O(1/\varepsilon)$  points uniformly from  $N$  and thus with probability  $(\varepsilon/k)^{O(1/\varepsilon)}$  we sample only points from  $O_i^*$ . Thus far, we sampled  $O(1/\varepsilon)$  points uniformly from  $N \cap O_i^*$ . What about the points in  $O_i^* \setminus N$ ? We can define  $N$  so that all points in  $O_i^* \setminus N$  are either very close to some of the  $(q_j)_j$  or they are very far from  $q_i$ . The points that are very close to points  $(q_j)_j$  are easy to treat. Indeed, we can approximately locate them and we just need to guess their mass, which is matters only when  $\geq \text{poly}(\varepsilon)\text{ALG}$ , and so we pay only a  $\log^{O(1/\varepsilon)}(1/\varepsilon)$  multiplicative overhead to guess the mass close to  $q_j$  for  $j = 1 \dots p = \Theta(1/\varepsilon)$ . As for a point  $f$  that is very far from  $q_i$  (say,  $\|f - q_i\| \gg \rho_i$ ) we notice that, although  $f$ 's contribution to  $\text{cost}(O_i^*, o_i)$  may be large, we have  $\text{cost}(f, o) \approx \text{cost}(f, o_i)$  for each  $o \in B(q_i, \rho_i) \subseteq B(o_i, (2 + \varepsilon)\rho_i)$  assuming  $q_i \in \text{core}(o_i)$ .

## 5 Experiments

In this section, we show that our new algorithm using multi-swap local search can be employed to design an efficient seeding algorithm for Lloyd's which outperforms both the classical  $k$ -means++ seeding and the single-swap local search from Lattanzi and Sohler [2019].

**Algorithms.** The multi-swap local search algorithm that we analysed above performs very well in terms of solution quality. This empirically verifies the improved approximation factor of our algorithm, compared to the single-swap local search of Lattanzi and Sohler [2019].

Motivated by practical considerations, we heuristically adapt our algorithm to make it very competitive with SSLS in terms of running time and still remain very close, in terms of solution quality, to the theoretically superior algorithm that we analyzed. The adaptation of our algorithm replaces the phase where it selects the  $p$  centers to swap-out by performing an exhaustive search over  $\binom{k+p}{p}$  subsets of

<sup>3</sup>The complexity in Theorem 12 can be improved by applying the same preprocessing techniques using coresets and dimensionality reduction, similar to what can be used to speed up the approach of Kanungo et al. [2004]. Our algorithm hence becomes asymptotically faster.

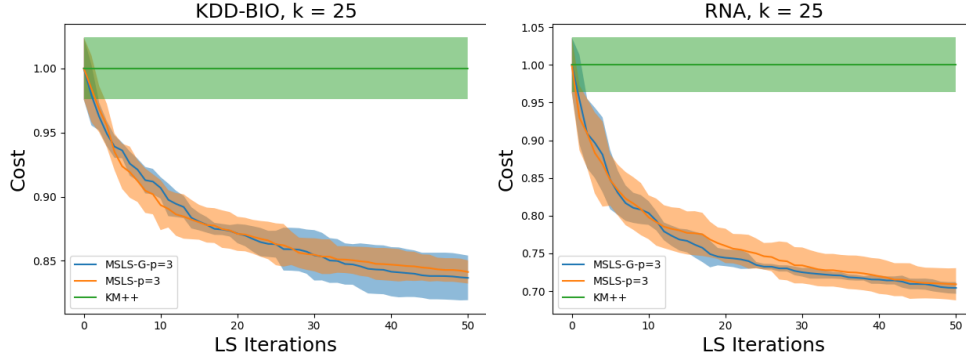

Figure 1: Comparison between MSLS and MSLS-G, for  $p = 3$ , for  $k = 25$ , on the datasets KDD-BIO and RNA. The  $y$  axis shows the solution cost divided by the means solution cost of KM++.

centers. Instead, we use an efficient heuristic procedure for selecting the  $p$  centers to swap-out, by greedily selecting one by one the centers to swap-out. Specifically, we select the first center to be the cheapest one to remove (namely, the one that increases the cost by the least amount once the points in its cluster are reassigned to the remaining centers). Then, we update all costs and select the next center iteratively. After  $p$  repetitions we are done. We perform an experimental evaluation of the “greedy” variant of our algorithm compared to the theoretically-sound algorithm from Section 3 and show that employing the greedy heuristic does not measurably impact performance.

The four algorithms that we evaluate are the following: 1) **KM++**: The  $k$ -means++ from Arthur and Vassilvitskii [2007], 2) **SSLS**: The Single-swap local search method from Lattanzi and Sohler [2019], 3) **MSLS**: The multi-swap local search from Section 3, and 4) **MSLS-G**: The greedy variant of multi-swap local search as described above.

We use  $\text{MSLS-G-}p = x$  and  $\text{MSLS-}p = x$ , to denote MSLS-G and MSLS with  $p = x$ , respectively. Notice that  $\text{MSLS-G-}p = 1$  is exactly SSLS. Our experimental evaluation explores the effect of  $p$ -swap LS, for  $p > 1$ , in terms of solution cost and running time.

**Datasets.** We consider the three datasets used in Lattanzi and Sohler [2019] to evaluate the performance of SSLS: 1) KDD-PHY – 100,000 points with 78 features representing a quantum physics task kdd [2004], 2) RNA – 488,565 points with 8 features representing RNA input sequence pairs Uzilov et al. [2006], and 3) KDD-BIO – 145,751 points with 74 features measuring the match between a protein and a native sequence kdd [2004]. We discuss the results for two of our datasets, namely KDD-BIO and RNA. We defer the results on KDD-PHY to the appendix and note that the results are very similar to the results on RNA.

We performed a preprocessing step to clean-up the datasets. We observed that the standard deviation of some features was disproportionately high. This causes all costs being concentrated in few dimensions making the problem, in some sense, lower-dimensional. Thus, we apply min-max scaling to all datasets and observed that this causes all our features’ standard deviations to be comparable.

**Experimental setting.** All our code is written in Python. The code will be made available upon publication of this work. We did not make use of parallelization techniques. To run our experiments, we used a personal computer with 8 cores, a 1.8 Ghz processor, and 15.9 GiB of main memory. We run all experiments 5 times and report the mean and standard deviation in our plots. All our plots report the progression of the cost either w.r.t local search steps, or Lloyd’s iterations. We run experiments on all our datasets for  $k = 10, 25, 50$ . The main body of the paper reports the results for  $k = 25$ , while the rest can be found in the appendix. We note that the conclusions of the experiments for  $k = 10, 50$  are similar to those of  $k = 25$ .

**Removing centers greedily.** We first we compare MSLS-G with MSLS. To perform our experiment, we initialize  $k = 25$  centers using  $k$ -means++ and then run 50 iterations of local search for both algorithms, for  $p = 3$  swaps. Due to the higher running of the MSLS we perform this experiment on 1% uniform sample of each of our datasets. We find out that the performance of the two algorithms is comparable on all our instances, while they both perform roughly 15%-27% at convergence. Figure 1 shows the aggregate results, over 5 repetitions of our experiment.

It may happen that MSLS, which considers all possible swaps of size  $p$  at each LS iteration, performs worse than MSLS-G as a sub-optimal swap at intermediate iterations may still lead to a better local

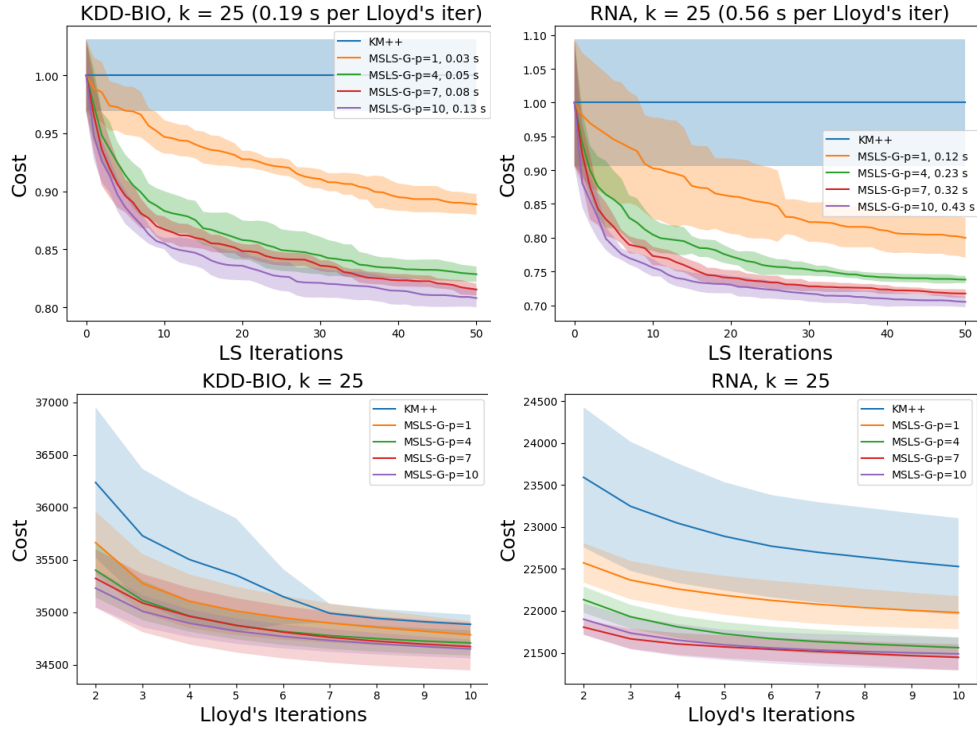

Figure 2: The first row compares the cost of MSLS-G, for  $p \in \{1, 4, 7, 10\}$ , divided by the mean cost of KM++ at each LS step, for  $k = 25$ . The legend reports also the running time of MSLS-G per LS step (in seconds). The second row compares the cost after each of the 10 iterations of Lloyd with seeding from MSLS-G, for  $p \in \{1, 4, 7, 10\}$  and 15 local search steps and KM++, for  $k = 25$ .

optimum by coincidence. Given that MSLS-G performs very comparably to MSLS, while it is much faster in practice, we use MSLS-G for the rest of our experiments where we compare to baselines. This allows us to consider higher values of  $p$ , without compromising much the running time.

**Results: Evaluating the quality and performance of the algorithms.** In our first experiment we run KM++ followed by 50 iterations of MSLS-G with  $p = 1, 4, 7, 10$  and plot the relative cost w.r.t. KM++ at each iteration, for  $k = 25$ . The first row of Figure 2 plots the results. Our experiment shows that, after 50 iterations MSLS-G for  $p = 4, 7, 10$  achieves improvements of roughly 10% compared to MSLS-G- $p = 1$  and of the order of 20% – 30% compared to KM++. We also report the time per iteration that each algorithm takes. For comparison, we report the running time of a single iteration of Lloyd’s next to the dataset’s name. It is important to notice that, although MSLS-G- $p = 1$  is faster, running more iterations MSLS-G- $p = 1$  is not sufficient to compete with MSLS-G when  $p > 1$ .

**Results: Evaluating the quality after postprocessing using Lloyd.** In our second experiment, we use KM++ and MSLS-G as a seeding algorithm for Lloyd’s and measure how much of the performance improvement measured in the first experiment is retained after running Lloyd’s. First, we initialize our centers using KM++ and the run 15 iterations of MSLS-G for  $p = 1, 4, 7$ . We measure the cost achieved by running 10 iterations of Lloyd’s starting from the solutions found by MSLS-G as well as KM++. In Figure 2 (second row) we plot the results. Notice that, according to the running times from the first experiment, 15 iterations iterations of MSLS-G take less than 10 iterations of Lloyd’s for  $p = 4, 7$  (and also for  $p = 10$ , except on RNA). We observe that MSLS-G for  $p > 1$  performs at least as good as SSLS from Lattanzi and Sohler [2019] and in some cases maintains non-trivial improvements.

## Conclusion and Future Directions

We present a new algorithm for the  $k$ -means problem and we show that it outperforms theoretically and experimentally state-of-the-art practical algorithms with provable guarantees in terms of solution quality. A very interesting open question is to improve our local search procedure by avoiding the exhaustive search over all possible size- $p$  subsets of centers to swap out, concretely an algorithm with running time  $\tilde{O}(2^{poly(1/\varepsilon)} ndk)$ .

## References

- Kdd cup. 2004. URL <http://osmot.cs.cornell.edu/kddcup/datasets.html>.
- Sara Ahmadian, Ashkan Norouzi-Fard, Ola Svensson, and Justin Ward. Better guarantees for  $k$ -means and Euclidean  $k$ -median by primal-dual algorithms. *SIAM Journal on Computing*, 49(4):FOCS17–97–FOCS17–156, 2019.
- David Arthur and Sergei Vassilvitskii.  $K$ -means++ the advantages of careful seeding. In *Proceedings of the eighteenth annual ACM-SIAM symposium on Discrete algorithms*, pages 1027–1035, 2007.
- David Arthur and Sergei Vassilvitskii. Worst-case and smoothed analysis of the ICP algorithm, with an application to the  $k$ -means method. *SIAM J. Comput.*, 39(2):766–782, 2009. doi: 10.1137/070683921. URL <http://dx.doi.org/10.1137/070683921>.
- Vijay Arya, Naveen Garg, Rohit Khandekar, Adam Meyerson, Kamesh Munagala, and Vinayaka Pandit. Local search heuristics for  $k$ -median and facility location problems. *SIAM J. Comput.*, 33(3):544–562, 2004. doi: 10.1137/S0097539702416402. URL <https://doi.org/10.1137/S0097539702416402>.
- Pranjal Awasthi, Moses Charikar, Ravishankar Krishnaswamy, and Ali Kemal Sinop. The hardness of approximation of euclidean  $k$ -means. In Lars Arge and János Pach, editors, *31st International Symposium on Computational Geometry, SoCG 2015, June 22-25, 2015, Eindhoven, The Netherlands*, volume 34 of *LIPIcs*, pages 754–767. Schloss Dagstuhl - Leibniz-Zentrum für Informatik, 2015. doi: 10.4230/LIPIcs.SOCG.2015.754. URL <https://doi.org/10.4230/LIPIcs.SOCG.2015.754>.
- Sayan Bandyapadhyay and Kasturi Varadarajan. On variants of  $k$ -means clustering. In *32nd International Symposium on Computational Geometry (SoCG 2016)*. Schloss Dagstuhl-Leibniz-Zentrum fuer Informatik, 2016.
- Luca Becchetti, Marc Bury, Vincent Cohen-Addad, Fabrizio Grandoni, and Chris Schwiegelshohn. Oblivious dimension reduction for  $k$ -means: beyond subspaces and the johnson-lindenstrauss lemma. In *Proceedings of the 51st Annual ACM SIGACT Symposium on Theory of Computing, STOC 2019, Phoenix, AZ, USA, June 23-26, 2019*, pages 1039–1050, 2019. doi: 10.1145/3313276.3316318. URL <https://doi.org/10.1145/3313276.3316318>.
- Anup Bhattacharya, Dishant Goyal, Ragesh Jaiswal, and Amit Kumar. On sampling based algorithms for  $k$ -means. In Nitin Saxena and Sunil Simon, editors, *40th IARCS Annual Conference on Foundations of Software Technology and Theoretical Computer Science, FSTTCS 2020, December 14-18, 2020, BITS Pilani, K K Birla Goa Campus, Goa, India (Virtual Conference)*, volume 182 of *LIPIcs*, pages 13:1–13:17. Schloss Dagstuhl - Leibniz-Zentrum für Informatik, 2020. doi: 10.4230/LIPIcs.FSTTCS.2020.13. URL <https://doi.org/10.4230/LIPIcs.FSTTCS.2020.13>.
- Moses Charikar and Sudipto Guha. Improved combinatorial algorithms for facility location problems. *SIAM J. Comput.*, 34(4):803–824, 2005. doi: 10.1137/S0097539701398594. URL <https://doi.org/10.1137/S0097539701398594>.
- Davin Choo, Christoph Grunau, Julian Portmann, and Vaclav Rozhon.  $k$ -means++: few more steps yield constant approximation. In Hal Daumé III and Aarti Singh, editors, *Proceedings of the 37th International Conference on Machine Learning*, volume 119 of *Proceedings of Machine Learning Research*, pages 1909–1917. PMLR, 2020. URL <https://proceedings.mlr.press/v119/choo20a.html>.
- Vincent Cohen-Addad. A fast approximation scheme for low-dimensional  $k$ -means. In Artur Czumaj, editor, *Proceedings of the Twenty-Ninth Annual ACM-SIAM Symposium on Discrete Algorithms, SODA 2018, New Orleans, LA, USA, January 7-10, 2018*, pages 430–440. SIAM, 2018. doi: 10.1137/1.9781611975031.29. URL <https://doi.org/10.1137/1.9781611975031.29>.
- Vincent Cohen-Addad and Karthik C. S. Inapproximability of clustering in  $l_p$  metrics. In David Zuckerman, editor, *60th IEEE Annual Symposium on Foundations of Computer Science, FOCS 2019, Baltimore, Maryland, USA, November 9-12, 2019*, pages 519–539. IEEE Computer Society, 2019. doi: 10.1109/FOCS.2019.00040. URL <https://doi.org/10.1109/FOCS.2019.00040>.

421 Vincent Cohen-Addad and Claire Mathieu. Effectiveness of local search for geometric optimization.  
422 In *31st International Symposium on Computational Geometry, SoCG 2015, June 22-25, 2015,*  
423 *Eindhoven, The Netherlands*, pages 329–343, 2015. doi: 10.4230/LIPIcs.SOCG.2015.329. URL  
424 <http://dx.doi.org/10.4230/LIPIcs.SOCG.2015.329>.

425 Vincent Cohen-Addad and Chris Schwiegelshohn. On the local structure of stable clustering instances.  
426 In Chris Umans, editor, *58th IEEE Annual Symposium on Foundations of Computer Science, FOCS*  
427 *2017, Berkeley, CA, USA, October 15-17, 2017*, pages 49–60. IEEE Computer Society, 2017. doi:  
428 10.1109/FOCS.2017.14. URL <https://doi.org/10.1109/FOCS.2017.14>.

429 Vincent Cohen-Addad, Philip N. Klein, and Claire Mathieu. Local search yields approximation  
430 schemes for k-means and k-median in euclidean and minor-free metrics. *SIAM J. Comput.*, 48(2):  
431 644–667, 2019. doi: 10.1137/17M112717X. URL <https://doi.org/10.1137/17M112717X>.

432 Vincent Cohen-Addad, David Saulpic, and Chris Schwiegelshohn. Improved coresets and sublinear  
433 algorithms for power means in euclidean spaces. *Advances in Neural Information Processing*  
434 *Systems*, 34:21085–21098, 2021.

435 Vincent Cohen-Addad, Hossein Esfandiari, Vahab S. Mirrokni, and Shyam Narayanan. Improved  
436 approximations for euclidean  $k$ -means and  $k$ -median, via nested quasi-independent sets. In Stefano  
437 Leonardi and Anupam Gupta, editors, *STOC '22: 54th Annual ACM SIGACT Symposium on*  
438 *Theory of Computing, Rome, Italy, June 20 - 24, 2022*, pages 1621–1628. ACM, 2022a. doi:  
439 10.1145/3519935.3520011. URL <https://doi.org/10.1145/3519935.3520011>.

440 Vincent Cohen-Addad, Kasper Green Larsen, David Saulpic, and Chris Schwiegelshohn. Towards  
441 optimal lower bounds for k-median and k-means coresets. In Stefano Leonardi and Anupam  
442 Gupta, editors, *STOC '22: 54th Annual ACM SIGACT Symposium on Theory of Computing, Rome,*  
443 *Italy, June 20 - 24, 2022*, pages 1038–1051. ACM, 2022b. doi: 10.1145/3519935.3519946. URL  
444 <https://doi.org/10.1145/3519935.3519946>.

445 Vincent Cohen-Addad, Kasper Green Larsen, David Saulpic, Chris Schwiegelshohn,  
446 and Omar Ali Sheikh-Omar. Improved coresets for euclidean k-means. In  
447 *NeurIPS*, 2022c. URL [http://papers.nips.cc/paper\\_files/paper/2022/hash/](http://papers.nips.cc/paper_files/paper/2022/hash/120c9ab5c58ba0fa9dd3a22ace1de245-Abstract-Conference.html)  
448 [120c9ab5c58ba0fa9dd3a22ace1de245-Abstract-Conference.html](http://papers.nips.cc/paper_files/paper/2022/hash/120c9ab5c58ba0fa9dd3a22ace1de245-Abstract-Conference.html).

449 Vincent Cohen-Addad, Euiwoong Lee, and Karthik C. S. Johnson coverage hypothesis: Inapproxima-  
450 bility of  $k$ -means and  $k$ -median in  $\ell_p$  metrics. In *Proceedings of the 2022 ACM-SIAM Symposium*  
451 *on Discrete Algorithms, SODA 2022*. SIAM, 2022d.

452 D. Feldman and M. Langberg. A unified framework for approximating and clustering data. In *STOC*,  
453 pages 569–578, 2011.

454 Zachary Friggstad, Mohsen Rezapour, and Mohammad R. Salavatipour. Local search yields a  
455 PTAS for k-means in doubling metrics. *SIAM J. Comput.*, 48(2):452–480, 2019. doi: 10.1137/  
456 17M1127181. URL <https://doi.org/10.1137/17M1127181>.

457 Fabrizio Grandoni, Rafail Ostrovsky, Yuval Rabani, Leonard J. Schulman, and Rakesh Venkat.  
458 A refined approximation for euclidean k-means. *Inf. Process. Lett.*, 176:106251, 2022. doi:  
459 10.1016/j.ipl.2022.106251. URL <https://doi.org/10.1016/j.ipl.2022.106251>.

460 Christoph Grunau, Ahmet Alper Özudogru, Václav Rozhon, and Jakub Tetek. A nearly tight analysis  
461 of greedy k-means++. In Nikhil Bansal and Viswanath Nagarajan, editors, *Proceedings of the*  
462 *2023 ACM-SIAM Symposium on Discrete Algorithms, SODA 2023, Florence, Italy, January 22-*  
463 *25, 2023*, pages 1012–1070. SIAM, 2023. doi: 10.1137/1.9781611977554.ch39. URL <https://doi.org/10.1137/1.9781611977554.ch39>.

465 Anupam Gupta and Kanat Tangwongsan. Simpler analyses of local search algorithms for facility  
466 location. *CoRR*, abs/0809.2554, 2008. URL <http://arxiv.org/abs/0809.2554>.

467 Venkatesan Guruswami and Piotr Indyk. Embeddings and non-approximability of geometric problems.  
468 In *Proceedings of the Fourteenth Annual ACM-SIAM Symposium on Discrete Algorithms, January*  
469 *12-14, 2003, Baltimore, Maryland, USA*, pages 537–538, 2003. URL [http://dl.acm.org/](http://dl.acm.org/citation.cfm?id=644108.644198)  
470 [citation.cfm?id=644108.644198](http://dl.acm.org/citation.cfm?id=644108.644198).

471 Mary Inaba, Naoki Katoh, and Hiroshi Imai. Applications of weighted voronoi diagrams and  
472 randomization to variance-based k-clustering. In *Proceedings of the tenth annual symposium on*  
473 *Computational geometry*, pages 332–339, 1994.

474 Ragesh Jaiswal, Amit Kumar, and Sandeep Sen. A simple D 2-sampling based PTAS for k-means and  
475 other clustering problems. *Algorithmica*, 70(1):22–46, 2014. doi: 10.1007/s00453-013-9833-9.  
476 URL <https://doi.org/10.1007/s00453-013-9833-9>.

477 Tapas Kanungo, David M. Mount, Nathan S. Netanyahu, Christine D. Piatko, Ruth Silverman,  
478 and Angela Y. Wu. A local search approximation algorithm for k-means clustering. *Com-*  
479 *putational Geometry*, 28(2):89–112, 2004. ISSN 0925-7721. doi: [https://doi.org/10.1016/](https://doi.org/10.1016/j.comgeo.2004.03.003)  
480 [j.comgeo.2004.03.003](https://doi.org/10.1016/j.comgeo.2004.03.003). URL [https://www.sciencedirect.com/science/article/pii/](https://www.sciencedirect.com/science/article/pii/S0925772104000215)  
481 [S0925772104000215](https://www.sciencedirect.com/science/article/pii/S0925772104000215). Special Issue on the 18th Annual Symposium on Computational Geometry  
482 - SoCG2002.

483 Madhukar R. Korupolu, C. Greg Plaxton, and Rajmohan Rajaraman. Analysis of a local search  
484 heuristic for facility location problems. *J. Algorithms*, 37(1):146–188, 2000. doi: 10.1006/jagm.  
485 2000.1100. URL <http://dx.doi.org/10.1006/jagm.2000.1100>.

486 Amit Kumar, Yogish Sabharwal, and Sandeep Sen. Linear-time approximation schemes for clustering  
487 problems in any dimensions. *J. ACM*, 57(2):5:1–5:32, 2010. doi: 10.1145/1667053.1667054. URL  
488 <https://doi.org/10.1145/1667053.1667054>.

489 Silvio Lattanzi and Christian Sohler. A better k-means++ algorithm via local search. In Kamalika  
490 Chaudhuri and Ruslan Salakhutdinov, editors, *Proceedings of the 36th International Conference on*  
491 *Machine Learning*, volume 97 of *Proceedings of Machine Learning Research*, pages 3662–3671.  
492 PMLR, 2019. URL <https://proceedings.mlr.press/v97/lattanzi19a.html>.

493 Euiwoong Lee, Melanie Schmidt, and John Wright. Improved and simplified inapproximability  
494 for k-means. *Inf. Process. Lett.*, 120:40–43, 2017. doi: 10.1016/j.ipl.2016.11.009. URL <https://doi.org/10.1016/j.ipl.2016.11.009>.

495 SP Lloyd. Least square quantization in pcm. bell telephone laboratories paper. published in journal  
496 much later: Lloyd, sp: Least squares quantization in pcm. *IEEE Trans. Inform. Theor.*(1957/1982),  
497 18, 1957.

499 Konstantin Makarychev, Yury Makarychev, Maxim Sviridenko, and Justin Ward. A bi-criteria  
500 approximation algorithm for k-means. In Klaus Jansen, Claire Mathieu, José D. P. Rolim, and Chris  
501 Umans, editors, *Approximation, Randomization, and Combinatorial Optimization. Algorithms and*  
502 *Techniques, APPROX/RANDOM 2016, September 7-9, 2016, Paris, France*, volume 60 of *LIPIcs*,  
503 pages 14:1–14:20. Schloss Dagstuhl - Leibniz-Zentrum für Informatik, 2016. doi: 10.4230/LIPIcs.  
504 APPROX-RANDOM.2016.14. URL [https://doi.org/10.4230/LIPIcs.APPROX-RANDOM.](https://doi.org/10.4230/LIPIcs.APPROX-RANDOM.2016.14)  
505 2016.14.

506 Konstantin Makarychev, Yury Makarychev, and Ilya P. Razenshteyn. Performance of johnson-  
507 lindenstrauss transform for k-means and k-medians clustering. In Moses Charikar and Edith Cohen,  
508 editors, *Proceedings of the 51st Annual ACM SIGACT Symposium on Theory of Computing, STOC*  
509 *2019, Phoenix, AZ, USA, June 23-26, 2019*, pages 1027–1038. ACM, 2019. doi: 10.1145/3313276.  
510 3316350. URL <https://doi.org/10.1145/3313276.3316350>.

511 Jirí Matousek. On approximate geometric k-clustering. *Discrete & Computational Geometry*,  
512 24(1):61–84, 2000. doi: 10.1007/s004540010019. URL [http://dx.doi.org/10.1007/](http://dx.doi.org/10.1007/s004540010019)  
513 [s004540010019](http://dx.doi.org/10.1007/s004540010019).

514 Andrew V Uzilov, Joshua M Keegan, and David H Mathews. Detection of non-coding rnas on the  
515 basis of predicted secondary structure formation free energy change. *BMC bioinformatics*, 7(1):  
516 1–30, 2006.

## Supplementary Material

### Proofs from Section 3

**Lemma 8.**  $\sum_{p \in P} \text{cost}(p, \mathcal{C}[\mathcal{O}^*[p]]) \leq 2OPT + ALG + 2\sqrt{ALG}\sqrt{OPT}.$

*Proof.*

$$\begin{aligned}
& \sum_{p \in P} \text{cost}(p, \mathcal{C}[\mathcal{O}^*[p]]) = \\
& \sum_{o_i \in \mathcal{O}^*} \sum_{p \in \mathcal{O}_i^*} \text{cost}(p, \mathcal{C}[o_i]) = \\
& \sum_{o_i \in \mathcal{O}^*} |\mathcal{O}_i^*| \cdot \text{cost}(o_i, \mathcal{C}[o_i]) + \text{cost}(\mathcal{O}_i^*, o_i) = \\
& OPT + \sum_{p \in P} \text{cost}(\mathcal{O}^*[p], \mathcal{C}[\mathcal{O}^*[p]]) \leq \\
& OPT + \sum_{p \in P} \text{cost}(\mathcal{O}^*[p], \mathcal{C}[p]) \leq \\
& OPT + \sum_{p \in P} (\|\mathcal{O}^*[p] - p\| + \|p - \mathcal{C}[p]\|)^2 = \\
& 2OPT + ALG + 2 \sum_{p \in P} \|\mathcal{O}^*[p], p\| \cdot \|p, \mathcal{C}[p]\| \leq 2OPT + ALG + 2\sqrt{ALG}\sqrt{OPT}.
\end{aligned}$$

The second equality is due to Lemma 1 and the last inequality is due to Cauchy-Schwarz.  $\square$

### Proofs from Section 4

In this section, we prove the following.

**Theorem 12.** *Given a set of  $n$  points in  $\mathbb{R}^d$  with aspect ratio  $\Delta$ , there exists an algorithm that computes a  $9 + \varepsilon$ -approximation to  $k$ -means in time  $ndk^{O(\varepsilon^{-2})} \log^{O(\varepsilon^{-1})}(\Delta) \cdot 2^{-\text{poly}(\varepsilon^{-1})}$ .*

We start with a key lemma showing that a sample of size  $O(1/\varepsilon)$  is enough to approximate 1-mean.

**Lemma 13** (Form Inaba et al. [1994]). *Given an instance  $P \subseteq \mathbb{R}^d$ , sample  $m = 1/(\varepsilon\delta)$  points uniformly at random from  $P$  and denote the set of samples with  $S$ . Then  $\text{cost}(P, \mu(S)) \leq (1 + \varepsilon) \text{cost}(P, \mu(P))$  with probability at least  $1 - \delta$ .*

*Proof.* We want to prove that with probability  $1 - \delta$  we have  $\|\mu(S) - \mu(P)\|^2 \leq \varepsilon \text{cost}(P, \mu(P)) / |P|$ . Then, applying Lemma 1 gives the desired result. First, we notice that  $\mu(P)$  is an unbiased estimator of  $\mu(P)$ , namely  $E[\mu(S)] = \mu(P)$ . Then, we have

$$E[\|\mu(S) - \mu(P)\|^2] = \frac{1}{m} \sum_{i=1}^{|S|} E[\|s_i - \mu(P)\|^2] = \frac{\text{cost}(P, \mu(P))}{m \cdot |P|}$$

where  $s_i$  are uniform independent samples from  $P$ . Applying Markov's inequality concludes the proof.  $\square$

The algorithm that verifies Theorem 12 is very similar to the MSLS algorithm from Section 3 and we use the same notation to describe it. The intuition is that in MSLS we sample  $\mathcal{Q} = \{q_1 \dots q_p\}$  hoping that  $q_i \in \text{core}(o_i)$  for each  $i$ ; here we refine  $q_i$  to a better approximation  $\hat{o}_i$  of  $o_i$  and swap the points  $(\hat{o}_i)_i$  rather than  $(q_i)_i$ . Our points  $\hat{o}_i$  are generated taking the average of some sampled point, thus we possibly have  $\hat{o}_i \notin P$  while, on the other hand,  $q_i \in P$ .

539 **A  $(9 + \varepsilon)$ -approximation MSLS algorithm.** First, we initialize our set of centers using  $k$ -means++.  
540 Then, we run  $ndk^{O(\varepsilon^{-2})} \cdot 2^{\text{poly}(\varepsilon^{-1})}$  local search steps, where a local search step works as follows.  
541 Set  $p = \Theta(\varepsilon^{-1})$ . We  $D^2$ -sample a set  $\mathcal{Q} = \{q_1 \dots q_p\}$  of points from  $P$  (without updating costs).  
542 Then, we iterate over all possible sets  $Out = \{c_1 \dots c_p\}$  of  $p$  distinct elements in  $\mathcal{C} \cup \mathcal{Q}$ . We define  
543 the set of *temporary* centers  $\mathcal{T} = (\mathcal{C} \cup \mathcal{Q}) \setminus Out$  and run a subroutine  $\text{APX-CENTERS}(\mathcal{T})$  which  
544 returns a list of  $\text{poly}(\varepsilon^{-1}) \cdot \log^{O(\varepsilon^{-1})}(\Delta)$  size- $s$  sets  $\widehat{In} = \{\hat{o}_1 \dots \hat{o}_s\}$  (where  $s = |\mathcal{Q} \setminus Out|$ ). We  
545 select the set  $\widehat{In}$  in this list such that the swap  $(\widehat{In}, Out \setminus \mathcal{Q})$  yields the maximum cost reduction.  
546 Then we select the set  $Out$  that maximizes the cost reduction obtained in this way. If  $(\widehat{In}, Out \setminus \mathcal{Q})$   
547 actually reduces the cost then we perform that swap.

548 **A subroutine to approximate optimal centers.** Here we describe the subroutine  
549  $\text{APX-CENTERS}(\mathcal{T})$ . Let  $\mathcal{Q} \setminus Out = \{q_1 \dots q_s\}$ . Recall that  $s \leq p = O(\varepsilon^{-1})$ . This subroutine out-  
550 puts a list of  $2^{\text{poly}(\varepsilon^{-1})} \cdot \log^{O(\varepsilon^{-1})}(\Delta)$  size- $s$  sets  $\widehat{In} = \{\hat{o}_1 \dots \hat{o}_s\}$ . Here we describe how to find a list  
551 of  $2^{\text{poly}(\varepsilon^{-1})} \cdot \log(\Delta)$  values for  $\hat{o}_1$ . The same will apply for  $\hat{o}_2 \dots \hat{o}_s$  and taking the Cartesian product  
552 yields a list of  $2^{\text{poly}(\varepsilon^{-1})} \cdot \log^{O(\varepsilon^{-1})}(\Delta)$  size- $s$  sets. Assume wlog that the pairwise distances between  
553 points in  $P$  lie in  $[1, \Delta]$ . We iterate over all possible values of  $\rho_1 \in \{1, (1 + \varepsilon) \dots (1 + \varepsilon)^{\lceil \log_{1+\varepsilon} \Delta \rceil}\}$ .  
554 We partition  $P$  in three sets: the set of *far points*  $F = \{x \in P \mid \text{cost}(x, q_1) > \rho_1^2 / \varepsilon^3\}$ , the set of  
555 *close points*  $C = \{x \in P \setminus F \mid \text{cost}(x, \mathcal{T}) \leq \varepsilon^3 \rho_1^2\}$  and the set of *nice points*  $N = P \setminus (C \cup F)$ .  
556 Then, we sample uniformly from  $N$  a set  $S$  of size  $\Theta(\varepsilon^{-1})$ . For each  $(s + 1)$ -tuple of coefficients  
557  $\alpha_0, \alpha_1 \dots \alpha_s \in \left\{1, (1 - \varepsilon), (1 - \varepsilon)^2, \dots, (1 - \varepsilon)^{\lceil \log_{1-\varepsilon}(\varepsilon^7) \rceil}\right\} \cup \{0\}$  we output the candidate solution  
558 given by the convex combination

$$\hat{o}_1 = \hat{o}_1(\alpha_0 \dots \alpha_s) = \frac{\alpha_0 \mu(S) + \sum_{i=1}^s \alpha_i q_i}{\sum_{i=0}^s \alpha_i} \quad (3)$$

559 so, for each value of  $\rho_1$ , we output  $2^{\text{poly}(\varepsilon^{-1})}$  values for  $\hat{o}_1$ . Hence,  $2^{\text{poly}(\varepsilon^{-1})} \cdot \log(\Delta)$  values in total.

## 560 Analysis

561 The key insight in the analysis of the MSLS algorithm from Section 3 was that every  $q_i$  was a proxy  
562 for  $o_i$  because  $q_i \in \text{core}(o_i)$ , and thus  $q_i$  provided a good center for  $O_i^*$ . In the analysis of this  
563 improved version of MSLS we replace  $q_i$  with  $\hat{o}_i$  which makes a better center for  $O_i^*$ . Formally, fixed  
564  $Out$ , we say that a point  $\hat{o}_i$  is a *perfect approximation* of  $o_i$  when  $\text{cost}(O_i^*, (\mathcal{C} \cup \{\hat{o}_i\}) \setminus Out) \leq$   
565  $(1 + \varepsilon)\text{OPT}_i + \varepsilon\text{OPT}/k$ . We define  $\tilde{\mathcal{O}}$  and  $\tilde{\mathcal{C}}$  as in Section 3, except that we replace  $\delta$  with  $\varepsilon$  (which  
566 here is not assumed to be a constant). Likewise, we build the set  $S$  of ideal multi-swaps as in Section 3.  
567 Recall that we say that a multi-swap  $(In, Out)$  is *strongly improving* if  $\text{cost}(P, (\mathcal{C} \cup In) \setminus Out) \leq$   
568  $(1 - \varepsilon/k) \cdot \text{cost}(P, \mathcal{C})$ . Let  $In = \{o_1 \dots o_s\} \subseteq \tilde{\mathcal{O}}$  and  $Out = \{c_1 \dots c_s\} \subseteq \tilde{\mathcal{C}}$ , we overload  
569 the definition from Section 3 and say that the ideal multi-swap  $(In, Out)$  is *good* if for every  
570  $\widehat{In} = \{\hat{o}_1 \dots \hat{o}_s\}$  such that each  $\hat{o}_i$  is a perfect approximation of  $o_i$  for each  $i = 1 \dots s$  the swap  
571  $(\widehat{In}, Out)$  is strongly improving. We call an ideal swap *bad* otherwise. As in Section 3, we define  
572 the *core* of an optimal center; once again we replace  $\delta$  with  $\varepsilon$ , which is no longer constant. The two  
573 following lemmas are our stepping stones towards Theorem 12.

574 **Lemma 14.** *If  $\text{ALG}/\text{OPT} > 9 + O(\varepsilon)$  then, with probability  $k^{-O(\varepsilon^{-1})} \cdot 2^{-\text{poly}(\varepsilon^{-1})}$ , there exists*  
575  *$Out \subseteq \mathcal{C} \cup \mathcal{Q}$  such that:*

- 576 (i) *If  $\mathcal{Q} \setminus Out = \{q_1 \dots q_s\}$  then  $q_1 \in \text{core}(o_1) \dots q_s \in \text{core}(o_s)$  for some  $o_1 \dots o_s \in \mathcal{O}^*$*
- 577 (ii) *If we define  $In = \{o_1 \dots o_s\}$  then  $(In, Out \setminus \mathcal{Q})$  is a good ideal swap.*

578 **Lemma 15.** *If (i) from Lemma 14 holds, then with probability  $k^{-O(\varepsilon^{-2})} \cdot 2^{-\text{poly}(\varepsilon^{-1})}$ , the list*  
579 *returned by  $\text{APX-CENTERS}$  contains  $\widehat{In} = \{\hat{o}_1 \dots \hat{o}_s\}$  such that  $\hat{o}_i$  is a perfect approximation of  $o_i$*   
580 *for each  $i = 1 \dots s$ .*

581 *Proof of Theorem 12.* Here we prove that our improved MSLS algorithm achieves a  $(9 + O(\varepsilon))$ -  
582 approximation, which is equivalent to Theorem 12 up to rescaling  $\varepsilon$ . Combining Lemma 14 and

Lemma 15 we obtain that, as long as  $\text{ALG}/\text{OPT} > 9 + O(\varepsilon)$ , with probability at least  $k^{-O(\varepsilon^{-2})} \cdot 2^{-\text{poly}(\varepsilon^{-1})}$ , the list returned by APX-CENTERS contains  $\widehat{In} = \{\hat{o}_1 \dots \hat{o}_s\}$  such that  $(\widehat{In}, \text{Out} \setminus \mathcal{Q})$  is strongly improving. If this happens, we call such a local step *successful*. Now the proof goes exactly as the proof of Theorem 3. Indeed, We show that  $k^{O(\varepsilon^{-2})} \cdot 2^{\text{poly}(\varepsilon^{-1})}$  local steps suffice to obtain  $\Omega(k \log \log k / \varepsilon)$  successful local steps, and thus to obtain the desired approximation ratio, with constant probability.

To prove the running time bound it is sufficient to notice that a local search step can be performed in time  $nd \log^{O(\varepsilon^{-1})}(\Delta) \cdot 2^{\text{poly}(\varepsilon^{-1})}$ .  $\square$

In the rest of this section, we prove Lemma 14 and Lemma 15.

**Observation 16.** *If we assume  $\delta = \varepsilon$  non-constant in Lemma 2, then performing the computations explicitly we obtain  $\Pr[q \in \text{core}(O_i^*)] \geq \text{poly}(\varepsilon)$ .*

In order to prove Lemma 14, we first prove the two lemmas. Lemma 17 is the analogous of Lemma 10 and Lemma 18 is the analogous of Lemma 11. Overloading once again the definition from Section 3, we define  $G$  as the union of cores of good optimal centers in  $\tilde{\mathcal{O}}$ , where an optimal center is defined to be good if at least one of the ideal multi-swaps in  $\mathcal{S}$  it belongs to is good (exactly as in Section 3).

**Lemma 17.** *If an ideal swap  $(In, Out)$  is bad, then we have*

$$\text{cost}(O_{In}^*, \mathcal{C}) \leq (1 + \varepsilon) \text{cost}(O_{In}^*, \mathcal{O}^*) + \text{Reassign}(In, Out) + \varepsilon \text{ALG}/k. \quad (4)$$

*Proof.* Let  $In = \{o_1 \dots o_s\}$ ,  $\widehat{In} = \{\hat{o}_1 \dots \hat{o}_s\}$  such that  $\hat{o}_i$  is a perfect approximation of  $o_i$  for each  $i = 1 \dots s$ . Recall that  $O_{In}^* := \bigcup_{i=1}^s O_i^*$ , then

$$\text{cost}(O_{In}^*, (\mathcal{C} \cup \widehat{In}) \setminus Out) \leq \sum_{i=1}^s \text{cost}(O_i^*, (\mathcal{C} \cup \{\hat{o}_i\}) \setminus Out) \leq (1 + \varepsilon) \text{cost}(O_{In}^*, \mathcal{O}^*). \quad (5)$$

Moreover,  $\text{Reassign}(In, Out) = \text{cost}(P \setminus O_{In}^*, \mathcal{C} \setminus Out) - \text{cost}(P \setminus O_{In}^*, \mathcal{C})$  because points in  $P \setminus C_{Out}$  are not affected by the swap. Therefore,  $\text{cost}(P, (\mathcal{C} \cup \widehat{In}) \setminus Out) \leq (1 + \varepsilon) \text{cost}(O_{In}^*, \mathcal{O}^*) + \text{Reassign}(In, Out) + \text{cost}(P \setminus O_{In}^*, \mathcal{C})$ . Suppose by contradiction that Equation (4) does not hold, then

$$\begin{aligned} \text{cost}(P, \mathcal{C}) - \text{cost}(P, (\mathcal{C} \cup \widehat{In}) \setminus Out) &= \\ \text{cost}(P \setminus O_{In}^*, \mathcal{C}) + \text{cost}(O_{In}^*, \mathcal{C}) - \text{cost}(P, (\mathcal{C} \cup \widehat{In}) \setminus Out) &\geq \varepsilon \text{ALG}/k. \end{aligned}$$

Hence,  $(\widehat{In}, Out)$  is strongly improving and this holds for any choice of  $\widehat{In}$ , contradiction.  $\square$

**Lemma 18.** *If  $\text{ALG}/\text{OPT} > 9 + O(\varepsilon)$  then  $\text{cost}(G, \mathcal{C}) \geq \text{cost}(P, \mathcal{C}) \cdot \text{poly}(\varepsilon)$ . Thus, if we  $D^2$ -sample  $q$  we have  $P[q \in G] \geq \text{poly}(\varepsilon)$ .*

*Proof.* First, we observe that the combined current cost of all optimal clusters in  $\mathcal{O}^* \setminus \tilde{\mathcal{O}}$  is at most  $k \cdot \varepsilon \text{ALG}/k = \varepsilon \text{ALG}$ . Now, we prove that the combined current cost of all  $O_i^*$  such that  $o_i$  is bad is  $\leq (1 - 2\varepsilon) \text{ALG}$ . Suppose, by contradiction, that it is not the case, then we have:

$$\begin{aligned} (1 - 2\varepsilon) \text{ALG} &< \sum_{\text{Bad } o_i \in \tilde{\mathcal{O}}} \text{cost}(O_i^*, \mathcal{C}) \leq \sum_{\text{Bad } (In, Out) \in \mathcal{S}} w(In, Out) \cdot \text{cost}(O_{In}^*, \mathcal{C}) \leq \\ &\sum_{\text{Bad } (In, Out)} w(In, Out) \cdot ((1 + \varepsilon) \text{cost}(O_{In}^*, \mathcal{O}^*) + \text{Reassign}(In, Out) + \varepsilon \text{ALG}/k) \leq \\ &(1 + \varepsilon) \text{OPT} + (2 + 2/p) \text{OPT} + (2 + 2/p) \sqrt{\text{ALG}} \sqrt{\text{OPT}} + \varepsilon \text{ALG}. \end{aligned}$$

The second and last inequalities make use of Observation 7. The third inequality uses Lemma 17.

Setting  $\eta^2 = \text{ALG}/\text{OPT}$  we obtain the inequality  $\eta^2 - (2 + 2/p \pm O(\varepsilon))\eta - (3 + 2/p \pm O(\varepsilon)) \leq 0$ . Hence, we obtain a contradiction in the previous argument as long as  $\eta^2 - (2 + 2/p \pm O(\varepsilon))\eta - (3 +$

614  $2/p \pm O(\varepsilon) > 0$ , which holds for  $p = \Theta(\varepsilon^{-1})$  and  $\eta^2 = 9 + O(\varepsilon)$ . A contradiction there implies that  
615 at least an  $\varepsilon$ -fraction of the current cost is due to points in  $\bigcup_{\text{Good } o_i \in \tilde{\mathcal{O}}} O_i^*$ . Thanks to Observation 16,  
616 we have  $P_{q \sim \text{cost}(q, \mathcal{C})}[q \in \text{core}(O_i^*) \mid q \in O_i^*] \geq \text{poly}(\varepsilon)$ . Therefore, we can conclude that the  
617 current cost of  $G = \bigcup_{\text{Good } o_i \in \tilde{\mathcal{O}}} \text{core}(O_i^*)$  is at least a  $\text{poly}(\varepsilon)$ -fraction of the total current cost.  $\square$

618 *Proof of Lemma 14.* Thanks to Lemma 18, we have that  $P[q_1 \in G] \geq \text{poly}(\varepsilon)$ . Whenever  $q_1 \in G$   
619 we have that  $q_1 \in \text{core}(o_1)$  for some good  $o_1$ . Then, for some  $s \leq p$  we can complete  $o_1$  with  
620  $o_2 \dots o_s$  such that  $In = \{o_1 \dots o_s\}$  belongs to a good swap. Concretely, there exists  $Out \subseteq \mathcal{C}$  such  
621 that  $(In, Out)$  is a good swap. Since  $In \subset \tilde{\mathcal{O}}$  we have  $\text{cost}(O_i^*, \mathcal{C}) > \varepsilon \text{OPT}/k$  for all  $o_i \in In$ ,  
622 which combined with Observation 16 gives that, for each  $i = 2 \dots s$ ,  $P[q_i \in \text{core}(o_i)] \geq \text{poly}(\varepsilon)/k$ .  
623 Hence, we have  $P[q_i \in \text{core}(o_i) \text{ for } i = 1 \dots s] \geq 2^{-\text{poly}(\varepsilon^{-1})} k^{-O(\varepsilon^{-1})}$ . Notice, however, that  
624  $(\widehat{In}, Out)$  is a  $s$ -swap and we may have  $s < p$ . Nevertheless, whenever we sample  $q_1 \dots q_s$  followed  
625 by any sequence  $q_{s+1} \dots q_p$  it is enough to choose  $Out' = Out \cup \{q_{s+1} \dots q_p\}$  to obtain that  
626  $(\{q_1 \dots q_p\}, Out')$  is an improving  $p$ -swap.  $\square$

627 In order to prove Lemma 15 we first need a few technical lemmas.

628 **Lemma 19** (Lemma 2 from Lattanzi and Sohler [2019]). *For each  $x, y, z \in \mathbb{R}^d$  and  $\varepsilon > 0$ ,*  
629  $\text{cost}(x, y) \leq (1 + \varepsilon) \text{cost}(x, z) + (1 + 1/\varepsilon) \text{cost}(z, y)$ .

630 **Lemma 20.** *Given  $q \in \mathbb{R}^d$  and  $Z \subseteq \mathbb{R}^d$  such that  $\text{cost}(Z, q) \leq \varepsilon^2 \Gamma$  then, for each  $o \in \mathbb{R}^d$*

$$(1 - O(\varepsilon)) \text{cost}(Z, o) - O(\varepsilon) \Gamma \leq |Z| \text{cost}(q, o) \leq (1 + O(\varepsilon)) \text{cost}(Z, o) + O(\varepsilon) \Gamma$$

631 *Proof.* To obtain the first inequality, we apply Lemma 19 to bound  $\text{cost}(z, o) \leq (1 + \varepsilon) \text{cost}(z, q) +$   
632  $(1 + 1/\varepsilon) \text{cost}(z, q)$  for each  $z \in Z$ . To obtain the second inequality, we bound  $\text{cost}(q, o) \leq$   
633  $(1 + \varepsilon) \text{cost}(z, o) + (1 + 1/\varepsilon) \text{cost}(z, q)$  for each  $z \in Z$ .  $\square$

634 **Lemma 21.** *Let  $X = \{x_1 \dots x_\ell\}$  be a weighted set of points in  $\mathbb{R}^d$  such that  $x_i$  has weight  $w_i$ .  
635 Let  $\mu$  be the weighted average of  $X$ . Let  $\hat{\mu} = \hat{\mu}(\alpha_1 \dots \alpha_\ell)$  be the weighted average of  $X$  where  $x_i$   
636 has weight  $\alpha_i$ . If  $w_i \leq \alpha_i \leq w_i/(1 - \varepsilon)$  for each  $i = 1 \dots \ell$ , then if we interpret  $\text{cost}(X, C)$  as  
637  $\sum_{x_i \in X} w_i \cdot \text{cost}(x_i, C)$  we have  $\text{cost}(X, \hat{\mu}) \leq (1 + O(\varepsilon)) \text{cost}(X, \mu)$ .*

638 *Proof.* We note that  $\mu$  minimizes the expression  $\text{cost}(X, \mu)$ . Moreover,  $\text{cost}(X, z) \leq \sum_{i=1}^\ell \alpha_i \cdot$   
639  $\text{cost}(x_i, z) \leq \text{cost}(X, z)/(1 - \varepsilon)$ . Since  $\hat{\mu}$  minimizes the expression  $\sum_{i=1}^\ell \alpha_i \cdot \text{cost}(x_i, z)$  it  
640 must be  $\text{cost}(X, \hat{\mu}) \leq \text{cost}(X, \mu)/(1 - \varepsilon)$ .  $\square$

641 Adopting the same proof strategy, we obtain the following.

642 **Observation 22.** *Thanks to Lemma 20, we can assume that the points in  $Z$  are concentrated in  $q$  for  
643 the purpose of computing a  $(1 + O(\varepsilon))$ -approximation to the 1-means problem on  $Z$ , whenever an  
644 additive error  $\Gamma$  is tolerable. Indeed, moving all points in  $Z$  to  $q$  introduces a  $1 + O(\varepsilon)$  multiplicative  
645 error on  $\text{cost}(Z, \cdot)$  and a  $O(\varepsilon) \Gamma$  additive error.*

646 The next lemma shows that a point  $z$  that is far from a center  $o$  experiences a small variation of  
647  $\text{cost}(z, o)$  when the position of  $o$  is slightly perturbed.

648 **Lemma 23.** *Given  $o, z \in \mathbb{R}^d$  such that  $\|o - z\| \geq r/\varepsilon$  we have that for every  $o' \in B(o, r)$ ,*  
649  $\text{cost}(z, o') = (1 \pm O(\varepsilon)) \text{cost}(z, o)$ .

650 *Proof.* It is enough to prove it for all  $o'$  that lie on the line  $L$  passing through  $o$  and  $z$ , any other  
651 point in  $o'' \in B(o, r)$  admits a point  $o' \in B(o, r) \cap L$  with  $\|o' - z\| = \|o'' - z\|$ . It is enough to  
652 compute the derivative of  $\text{cost}(z, \cdot)$  with respect to the direction of  $L$  and see that  $\frac{\partial \text{cost}(z, \cdot)}{\partial L}|_{B(o, r)} =$   
653  $(1 \pm O(\varepsilon))r/\varepsilon$ . Thus,  $\text{cost}(z, o') = \text{cost}(z, o) \pm (1 \pm O(\varepsilon))r^2/\varepsilon = (1 \pm O(\varepsilon)) \text{cost}(z, o)$ .  $\square$

654 *Proof of Lemma 15.* Here we prove that for each  $o_1 \dots o_s$  there exist coefficients  $\alpha_0^{(i)} \dots \alpha_s^{(i)} \in$   
655  $\{1, (1 - \varepsilon) \dots (1 - \varepsilon)^{\lceil \log_{1-\varepsilon}(\varepsilon^7) \rceil}\} \cup \{0\}$  such that the convex combination  $\hat{o}_i = \hat{o}_i(\alpha_0^{(i)} \dots \alpha_s^{(i)})$   
656 is a perfect approximation of  $o_i$ , with probability  $k^{-O(\varepsilon^{-2})} \cdot 2^{-\text{poly}(\varepsilon^{-1})}$ . Wlog, we show this

for  $o_1$  only. Concretely, we want to show that, with probability  $k^{-O(\varepsilon^{-1})} \cdot 2^{-poly(\varepsilon^{-1})}$ , there exist coefficients  $\alpha_0 \dots \alpha_s$  such that  $\hat{o}_1 = \hat{o}_1(\alpha_0 \dots \alpha_s)$  satisfies  $\text{cost}(O_1^*, (\mathcal{C} \cup \{\hat{o}_1\}) \setminus \text{Out}) \leq (1 + O(\varepsilon))\text{OPT}_1 + O(\varepsilon)\text{OPT}/k$ . Taking the joint probability of these events for each  $i = 1 \dots s$  we obtain the success probability  $k^{-O(\varepsilon^{-2})} \cdot 2^{-poly(\varepsilon^{-1})}$ . Note that we are supposed to prove that  $\text{cost}(O_1^*, (\mathcal{C} \cup \{\hat{o}_1\}) \setminus \text{Out}) \leq (1 + \varepsilon)\text{OPT}_1 + \varepsilon\text{OPT}/k$ , however we prove a weaker version where  $\varepsilon$  is replaced by  $O(\varepsilon)$ , which is in fact equivalent up to rescaling  $\varepsilon$ .

Similarly to  $\mathcal{C}[\cdot]$  and  $\mathcal{O}^*[\cdot]$  define  $\mathcal{T}[p]$  as the closest center to  $p$  in  $\mathcal{T}$ . Denote with  $C_1, F_1$  and  $N_1$  the intersections of  $O_1^*$  with  $C, F$  and  $N$  respectively. In what follows we define the values of  $\alpha_0 \dots \alpha_s$  that define  $\hat{o}_1 = \hat{o}_1(\alpha_0 \dots \alpha_s)$  and show an assignment of points in  $O_1^*$  to centers in  $(\mathcal{C} \cup \{\hat{o}_1\}) \setminus \text{Out}$  with cost  $(1 + O(\varepsilon))\text{OPT}_1 + O(\varepsilon)\text{OPT}/k$ . Recall that we assume that  $q_i \in \text{core}(o_i)$  for each  $i = 1 \dots s$ .

In what follows, we assign values to the coefficients  $(\alpha_i)_i$ . It is understood that if the final value we choose for  $\alpha_i$  is  $v$  then we rather set  $\alpha_i$  to the smallest power of  $(1 - \varepsilon)$  which is larger than  $v$ , if  $v > \varepsilon^7$ . Else, set  $\alpha_i$  to 0. We will see in the end that this restrictions on the values of  $\alpha_i$  do not impact our approximation.

In what follows, we will assign the points in  $O_1^*$  to  $\mathcal{C} \setminus \text{Out}$ , if this can be done inexpensively. If it cannot, then we will assign points to  $\hat{o}_1$ . In order to compute a good value for  $\hat{o}_1$  we need an estimate of the average of points assigned to  $\hat{o}_1$ . For points in  $N_1$ , computing this average is doable (leveraging Lemma 13) while for points in  $O_1^* \setminus N_1$  we show that either their contribution is negligible or we can collapse them so as to coincide with some  $q_i \in \mathcal{Q}$  without affecting our approximation. The coefficients  $(\alpha_i)_{i \geq 1}$  represent the fraction of points in  $O_i^*$  which is collapsed to  $q_i$ .  $\alpha_0$  represents the fraction of points in  $O_i^*$  which average we estimate as  $\mu(S)$ . Thus, Equation (3) defines  $\hat{o}_i$  as the weighted average of points  $q_i$ , where the weights are the (approximate) fractions of points collapsed onto  $q_i$ , together with the the average  $\mu(S)$  and its associated weight  $\alpha_0$ .

**Points in  $C_1$ .** All points  $p \in C_1$  such that  $\mathcal{T}[p] \notin \mathcal{Q}$  can be assigned to  $\mathcal{T}[p] \in \mathcal{C} \setminus \text{Out}$  incurring a total cost of at most  $\varepsilon^6\text{OPT}_1$ , by the definition of  $C_1$ . Given a point  $p \in C_1$  with  $\mathcal{T}[p] \in \mathcal{Q}$  we might have  $\mathcal{T}[p] \notin \mathcal{C} \setminus \text{Out}$  and thus we cannot assign  $p$  to  $\mathcal{T}[p]$ . Denote with  $W$  the set of points  $p$  with  $\mathcal{T}[p] \in \mathcal{Q}$ . Our goal is now to approximate  $\mu(W)$ . In order to do that, we will move each  $p \in W$  to coincide with  $q_i = \mathcal{T}[p]$ . We can partition  $W$  into  $W_1 \dots W_s$  so that for each  $z \in W_i$   $\mathcal{T}[z] = q_i$ . If  $p \in Z_i$  then we have  $\|p - q_i\|^2 \leq \varepsilon^3 \rho_1^2$ . Hence, thanks to Observation 22, we can consider points in  $W_i$  as if they were concentrated in  $q_i$  while losing at most an additive factor  $O(\varepsilon)\text{OPT}_1$  and a multiplicative factor  $(1 + \varepsilon)$  on their cost. For  $i = 1 \dots s$ , set  $\alpha_i \leftarrow |W_i|/|O_1^*|$ . In this way,  $\sum_{i=1}^s \alpha_i \cdot q_i / \sum_{i=1}^s \alpha_i$  is an approximates solution to 1-mean on  $W$  up to a multiplicative factor  $(1 + \varepsilon)$  and an additive factor  $O(\varepsilon)\text{OPT}_1$ .

**Points in  $N_1$ .** Consider the two cases: (i)  $\text{cost}(N_1, \mathcal{T}) > \varepsilon^2\text{OPT}/k$ ; (ii)  $\text{cost}(N_1, \mathcal{T}) \leq \varepsilon^2\text{OPT}/k$ .

Case (i). We show that in this case  $\mu(S)$  is a  $(1 + \varepsilon)$ -approximation for 1-mean on  $N_1$ , with probability  $k^{-O(\varepsilon^{-1})} \cdot 2^{-poly(\varepsilon^{-1})}$ . First, notice that if we condition on  $S \subseteq N_1$  then Lemma 13 gives that  $\mu(S)$  is a  $(1 + \varepsilon)$ -approximation for 1-mean on  $N_1$  with constant probability. Thus, we are left to prove that  $S \subseteq N_1$  with probability  $k^{-O(\varepsilon^{-1})} \cdot 2^{-poly(\varepsilon^{-1})}$ . We have that the  $P_{p \sim \text{cost}(p, \mathcal{T})}[p \in N_1 \mid p \in N] \geq \varepsilon^2/k$ , however the costs w.r.t.  $\mathcal{T}$  of points in  $N$  varies of at most a factor  $poly(\varepsilon^{-1})$ , thus  $P_{p \sim \text{Unif}}[p \in N_1 \mid p \in N] \geq poly(\varepsilon)/k$ . The probability of  $S \subseteq N_1$  is thus  $(poly(\varepsilon)/k)^{|S|} = k^{-O(\varepsilon^{-1})} \cdot 2^{-poly(\varepsilon^{-1})}$ . In this case, we set  $\alpha_0 \leftarrow |N_1|/|O_1^*|$  because  $\mu(S)$  approximates the mean of the entire set  $N_1$ .

Case (ii). Here we give up on estimating the mean of  $N_1$  and set  $\alpha_0 \leftarrow 0$ . The point  $x \in N_1$  such that  $\mathcal{T}[x] \notin \mathcal{Q}$  can be assigned to  $\mathcal{T}[x]$  incurring a combined cost of  $\varepsilon^2\text{OPT}/k$ . We partition the remaining points in  $N_1$  into  $Z_1 \cup \dots Z_s$  where each point  $x$  is placed in  $Z_i$  if  $\mathcal{T}[x] = q_i$ . Now, we collapse the points in  $Z_i$  so as to coincide with  $q_i$  and show that this does not worsen our approximation factor. In terms of coefficients  $(\alpha_i)_i$ , this translates into the updates  $\alpha_i \leftarrow \alpha_i + |Z_i|/|O_i^*|$  for each  $i = 1 \dots s$ .

Indeed, using Observation 22 we can move all points in  $Z_i$  to  $q_i$  incurring an additive combined cost of  $\varepsilon\text{OPT}/k$  and a multiplicative cost of  $1 + O(\varepsilon)$ .

708 **Points in  $F_1$ .** Points in  $F_1$  are very far from  $q_1$  and thus far from  $o_1$ , hence even if their contribution  
709 to  $\text{cost}(O_1^*, o_1)$  might be large, we have  $\text{cost}(F_1, o_1) = (1 \pm O(\varepsilon))\text{cost}(F_1, o')$  for all  $o'$  in a ball  
710 of radius  $\rho_1/\varepsilon$  centered in  $o_1$ , thanks to Lemma 23.

711 Let  $H$  be the set of points that have not been assigned to centers in  $\mathcal{C} \setminus \text{Out}$ . In particular,  $H = W \cup N_1$   
712 if points in  $N_1$  satisfy case (i) and  $H = W \cup Z_1 \dots Z_s$  if points in  $N_1$  satisfy case (ii). We consider  
713 two cases.

714 If  $\|\mu(H) - q_1\| \leq \rho/\varepsilon$ , then  $\|\mu(H) - o_1\| \leq \rho(1 + \varepsilon + 1/\varepsilon)$  because  $q_1 \in \text{core}(o_1)$ . Since  
715 for each  $f \in F_1$  we have  $\|f - o_1\| \geq \|f - q_1\| - (1 + \varepsilon)\rho \geq \Omega(\rho/\varepsilon^3)$  then  $\text{cost}(f, o') =$   
716  $(1 \pm O(\varepsilon))\text{cost}(f, o_1)$  for each  $o'$  in a ball of radius  $O(\rho/\varepsilon)$  centered in  $o_1$ , and so in particular for  
717  $o' = \mu(H)$ . Thus in this case we can simply disregard all points in  $F_1$  and computing  $\hat{o}_1$  according  
718 to the  $(\alpha_i)_i$  defined above yields a perfect approximation of  $o_i$ .

719 Else, if  $\|\mu(H) - q_1\| > \rho/\varepsilon$ , a similar argument applies to show that  $\text{cost}(H, o') = (1 \pm$   
720  $\varepsilon)\text{cost}(H, o)$  for each  $o'$  in ball of radius  $O(\rho)$  centered in  $o_1$ . Indeed, we can rewrite  $\text{cost}(H, o')$   
721 as  $|H| \cdot \text{cost}(\mu(H), o') + \text{cost}(\mu(H), H)$ . If  $\|\mu(H) - q_1\| < \rho/\varepsilon$  the first term varies of at most a  
722 factor  $(1 + \varepsilon)$  and the second term is constant. Thus in this case  $\hat{o}_1 = q_1$  is a perfect approximation  
723 of  $o_1$  and we simply set  $\alpha_1 = 1$  and  $\alpha_j = 0$  for  $j \neq 1$ . In other words, here  $\mu(N_1 \cup H)$  is too far  
724 from  $q_1$  (and thus  $o_1$ ) to significantly influence the position of  $\hat{o}_1$  and the same holds for any point in  
725  $F_1$ . This works, of course, because we assumed  $q_1 \in \text{core}(o_1)$ .  $\square$

726 **Discussing the limitations on the coefficients values.** The proof above would work smoothly if  
727 we were allowed to set  $\alpha_i$  to exactly the values discussed above, representing the fractions of points  
728 from  $O_i^*$  captured by different  $q_i$ s. However, to make the algorithm efficient we limit ourselves to  
729 values in  $\{1, (1 - \varepsilon) \dots (1 - \varepsilon)^{\lceil \log_{1-\varepsilon}(\varepsilon^7) \rceil}\} \cup \{0\}$ . Lemma 21 shows that as long as the values of  
730  $(\alpha_i)_i$  estimate the frequencies described above up to a factor  $1 \pm O(\varepsilon)$  then the approximation error  
731 is within a multiplicative factor  $1 \pm O(\varepsilon)$ .

732 We are left to take care of the case in which  $\alpha_i$  is set to a value  $< \varepsilon^7$ . We set  $\alpha_i$  when dealing  
733 with points in  $C_1 \cup N_1$  and for each  $x \in C_1 \cup N_1$  we have, for each  $o' \in B(q_1, (1 + \varepsilon)\rho)$ ,  
734  $\text{cost}(x, o') \leq 2\text{cost}(q_1, o') + 2\text{cost}(x, q_1) = O(\rho_1 \varepsilon^{-6})$ . Thus, if we simply set  $\alpha_i \leftarrow 0$  whenever  
735 we have  $\alpha_i < \varepsilon^7$  then the combined cost of points in  $O_1^*$  with respect to  $o'$  varies by  $\varepsilon^7 |O_1^*| \cdot \rho_1 \varepsilon^{-6} =$   
736  $O(\varepsilon)\text{OPT}_1$ . Effectively, ignoring these points does not significantly impact the cost. hence solving  
737 1-mean ignoring these points finds a  $(1 + O(\varepsilon))$ -approximate solution to the original problem.

## 738 Additional Experimental Evaluation

739 In this section we report additional experiments which presentation did not fit in the main body. In  
740 particular, we run experiments on the dataset KDD-PHY and for  $k = 10, 50$ .

741 In Figure 3 we compare MSLS-G with MSLS. To perform our experiment, we initialize  $k = 25$   
742 centers using KM++ and then run 50 iterations of local search for both algorithms, for  $p \in \{2, 3\}$   
743 swaps. We repeat each experiment 5 times. For ease of comparison, we repeat the plot for the  
744 KDD-BIO and RNA datasets that we present in the main body of the paper. Due to the higher running  
745 of the MSLS we perform this experiments on 1% uniform sample of each of our datasets. We find  
746 out that the performance of the two algorithms is comparable on all our instances, while they both  
747 perform roughly 15%-27% better than  $k$ -means++ at convergence.

748 In Figure 4 we run KM++ followed by 50 iterations of MSLS-G with  $p = 1, 4, 7, 10$  and  $k =$   
749  $10, 25, 50$  (excluding the degenerate case  $p = k = 10$ ) and plot the relative cost w.r.t. KM++ at  
750 each iteration. The results for  $k = 25$  on KDD-BIO and RNA can be found in Figure 2. We repeat  
751 each experiment 5 times. Our experiment shows that, after 50 iterations MSLS-G for  $p = 4, 7, 10$   
752 achieves improvements of roughly 5 – 10% compared to MSLS-G- $p = 1$  and of the order of  
753 20% – 40% compared to KM++. These improvements are more prominent for  $k = 25, 50$ . We also  
754 report the time per iteration that each algorithm takes. For comparison, we report the running time  
755 of a single iteration of Lloyd's next to the dataset's name. Notice that the experiment on RNA for  
756  $k = 50$  is performed on a 10% uniform sample of the original dataset, due to the high running time.

757 In Figure 5, we use KM++ and MSLS-G as a seeding algorithm for Lloyd's and measure how much  
758 of the performance improvement measured is retained after running Lloyd's. First, we initialize

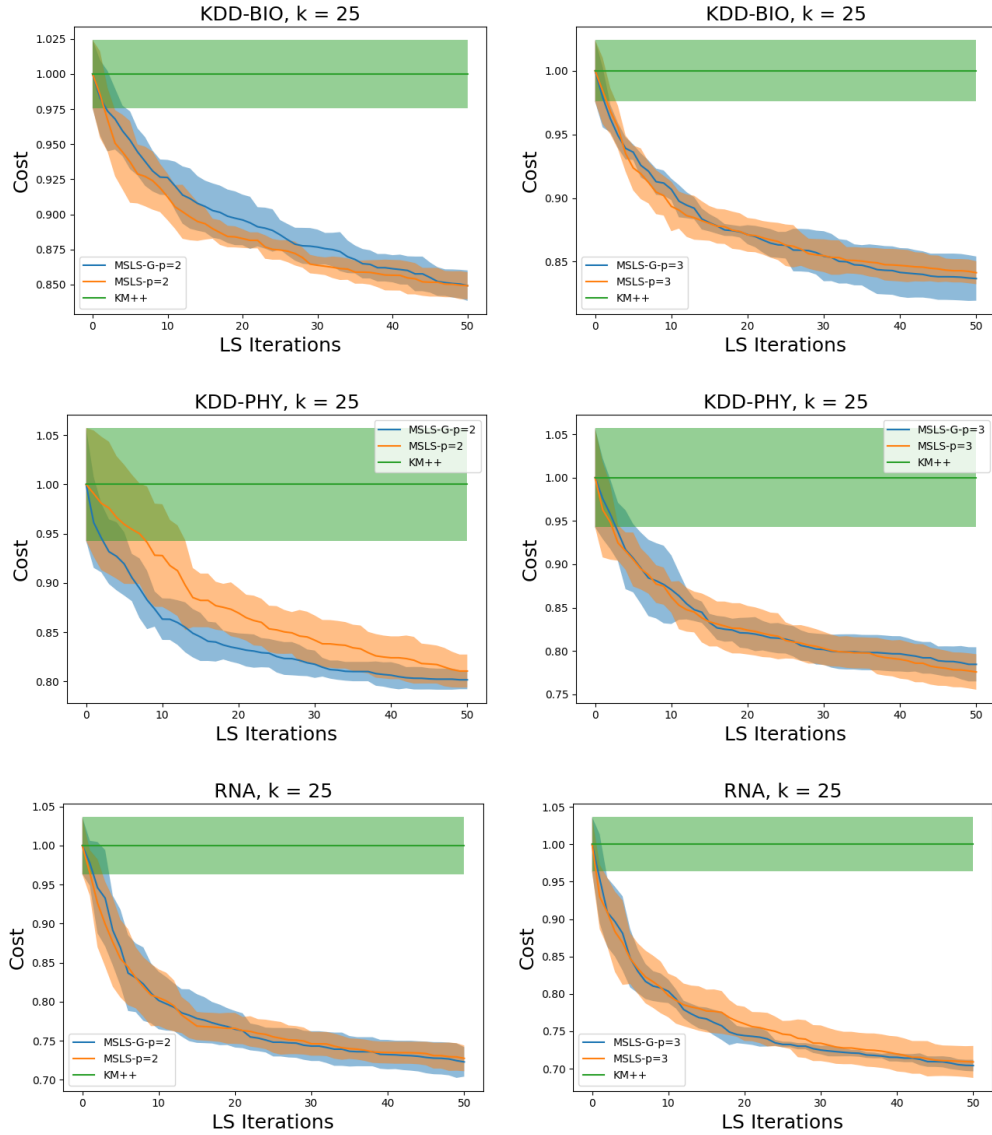

Figure 3: Comparison between MSLS and MSLS-G, for  $p = 2$  (left column) and  $p = 3$  (right column), for  $k = 25$ , on the datasets KDD-BIO (first row), KDD-PHY (second row) and RNA (third row). The  $y$  axis shows the mean solution cost, over the 5 repetitions of the experiment, divided by the means solution cost of KM++.

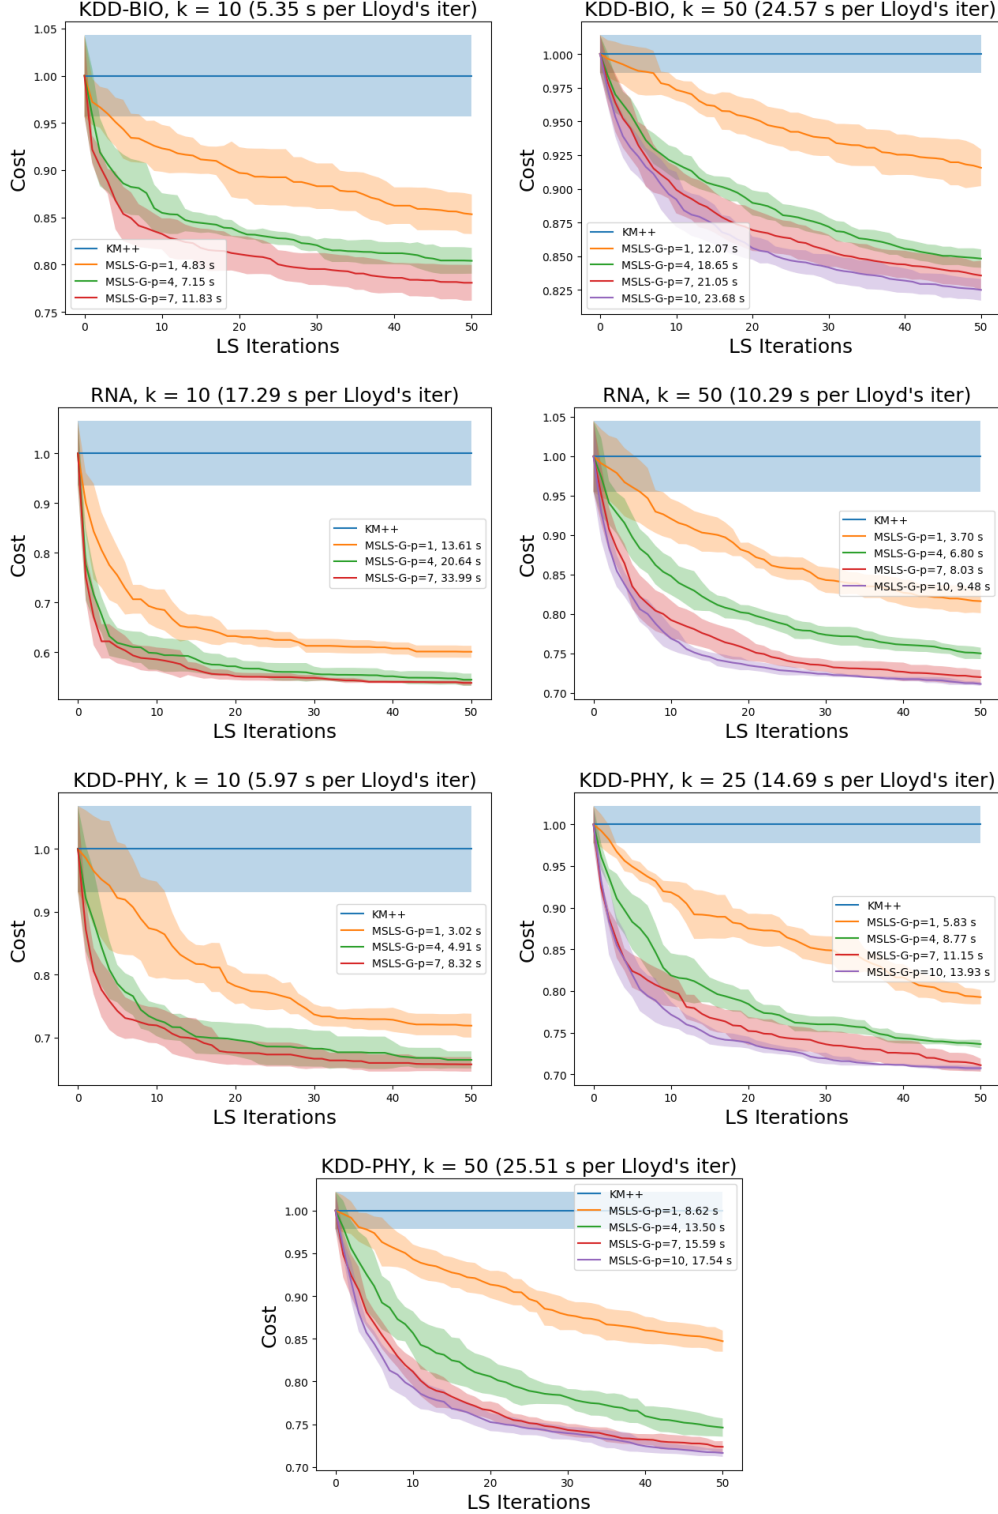

Figure 4: We compare the cost of MSLS-G, for  $p \in \{1, 4, 7, 10\}$ , divided by the mean cost of KM++ at each LS step, for  $k \in \{10, 25, 50\}$ , excluding the degenerate case  $p = k = 10$ . The legend reports also the running time of MSLS-G per LS step (in seconds). The experiments were run on all datasets: KDD-BIO, RNA and KDD-PHY, excluding the case of  $k = 25$  for KDD-BIO and RNA which are reported in the main body of the paper.

our centers using KM++ and then run 15 iterations of MSLS-G for  $p = 1, 4, 7$ . We measure the cost achieved by running 10 iterations of Lloyd’s starting from the solutions found by MSLS-G as well as KM++. We run experiments for  $k = 10, 25, 50$  and we repeat each experiment 5 times. We observe that for  $k = 25, 50$  MSLS-G for  $p > 1$  performs at least as good as SSLS from Lattanzi and Sohler [2019] and in some cases maintains non-trivial improvements. These improvements are not noticeable for  $k = 10$ ; however, given how Lloyd’s behave for  $k = 10$  we conjecture that  $k = 10$  might be an “unnatural” number of clusters for our datasets.

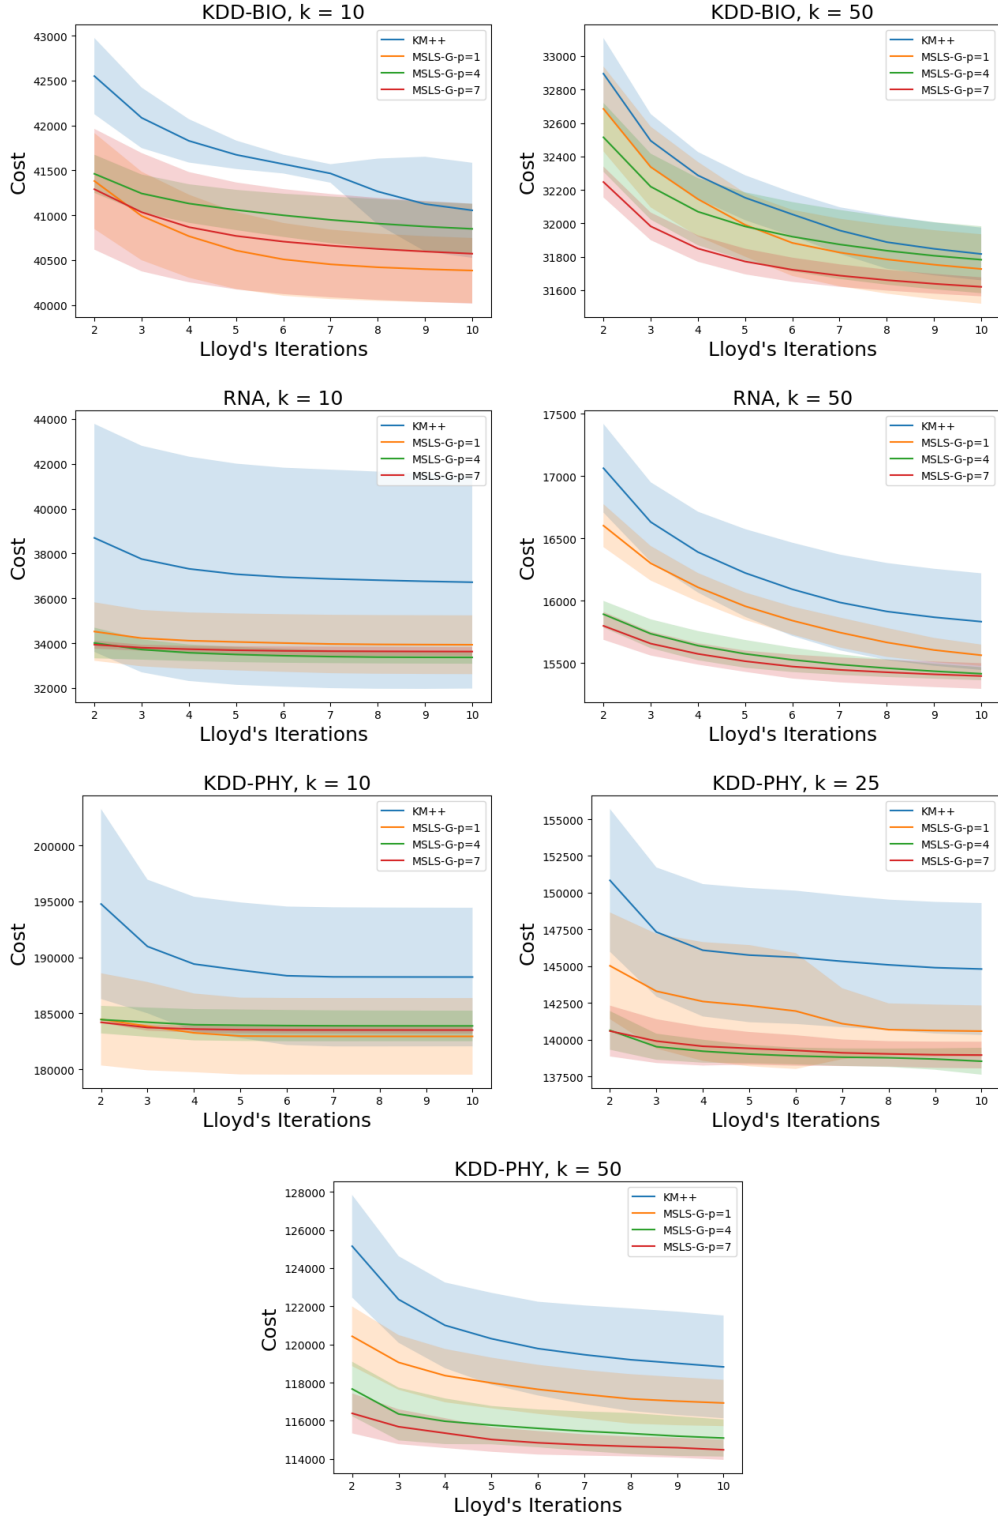

Figure 5: We compare the cost after each of the 10 iterations of Lloyd with seeding from MSLS-G, for  $p \in \{1, 4, 7, 10\}$  and 15 local search steps and KM++, for  $k \in \{10, 25, 50\}$ . We excluded the degenerate case  $p = k = 10$ , and the experiments reported in the main body of the paper.
